# Supplementary material for: Effective inundation of continental United States communities with 21st century sea level rise
Source: Oxford University Press journal article supplement (doi:10.1525/elementa.234), 2017-01-01
Supplement: elementa-5-234-s1.xlsx [file elementa-5-234-s1.xlsx]

## Sheet: UCS Risings Seas ground truth
Effective inundation of continental United States communities with 21st century sea level: Ground truthing of inundated communities
#	State	Location/County/Parish	Town/District	First Name	Last Name	Title	Organization	Date	Summary
1	Louisiana	Terrebonne Parish		Mart	Black	AICP, Director	Coastal Restoration & Preservation, Terrebonne Parish Consolidated Government	2017-05-23	Mart verified that they do get the type of flooding particularly when there is a high tide and a southern wind and that they see most of the flooding in the eastern portion of the parish (which aligns well w/ our data). On Highway 55 there is often flooding at Montegut – the water will be there for a while until it subsides. With a strong SE wind water piles up. A strong wind from the north will …
2	Louisiana	Terrebonne Parish		Kristina	Peterson	Facilitator as well as Theresa Dardar, Donald Dardar and Katie DeHart	Lowland Center	2017-05-19	They universally confirmed that they are seeing flooding every other week (on average) and of 10% or more of their usable land. They reported that the situation is even worse in Plaquemines Parish. Whenever there's a south wind, their yards flood, as does the "island road," which is the road connecting Pointe-aux-chene to Isle de Jean Charles. The road becomes impassable. They noted that levees d…
3	Maryland	Dorchester County		Brian	Soper	Environmental Planner	Dorchester County Planning and Zoning	2017-03-09	Yes confirmed what are maps are showing. They had an inundation study done in 2006 – fairly similar with greater depth. Flooding on water street in Cambridge. Areas have populations that are dwindling, slow retreat. Middle island has subsidence, erosions, flooding – not much development. With 1” of rain at right tide will have roads cut off. Structural shore erosion measures in place at Fishing c…
4	North Carolina	Hyde County	Engelhard	Jerry	Hardison	Chief Building Inspector	Hyde County	2017-03-08	He said he is 65 years old and that he lives in Engelhard and the back roads get flooded during the high tides and sometimes it will stay flooded for a week or more (not HWY 264 though). However he said most of the area doesn't flood as much as it should be b/c they have pumps; See Fairfield Drainage District and Swan Quarter·
5	Florida	Lower and Middle Keys		Rhonda	Haag	Director Sustainability and Projects	Monroe County	2017-02-24	Confirmed that our maps line up with what they are seeing, places like Key Largo and Key Pine are seeing about 30 days of flooding focused around April and October. See Monroe County Pilot Roads Project: Twin Lakes and Sands Communities January 2017, p.14.
6	Texas	Bolivar Peninsula		Michael	Shannon	Galveston County Engineer		2017-04-01	While parts of Galveston do not see significant flooding, Port Bolivar does see the degree of flooding consistent with our research
7	Texas	Bolivar Peninsula	Crystal Beach	Matt	Summers	Crystal Beach Director of fire department and EMS	Crystal beach	2017-04-01	Flooding during monthly high tides with flooding on roads.
8	New Jersey	Bergen County		Hernan	Lopez	Emergency Management Coordinator		4/17/17 and 5/22/2017	Confirmation of flooding at least twice a month of the areas in Bergen county listed as chronically inundated as per the ICAT definition and at the percentage indicated for Little Ferry, Carlsdat, Teterboro and Moonachie.
9	Georgia	Glynn County	Brunswick	Garrow	Alberson	City of Brunswick GA		2017-03-21	Garrow confirmed that in the downtown area and areas such as Riverside neighborhood, the biggest flooding problem is related to high tides. He said that they get tidal flooding 3-4 times a year for 2-3 days each time. So that is around 12 days. This tidal flooding is usually limited to roadways and open spaces and very rarely gets into any structures.I think you are probably close on the time/dur…
10	Maryland	Anne Arundel	Annapolis	Lisa	Craig	Chief of Historical Preservation	City of Annapolis	2017-10-26	Lisa confirmed that Annapolis experiences 40-50 minor flood events per year. These catch the attention of locals and tourists because they often inpinge upon the city's historic district. In one case, they caused the cancellation or delay of a regatta, which raised awareness about local flooding issues greatly. Lisa mentioned that when flooding occurs, foot traffic to local businesses decreases. …
11	South Carolina	Charleston	Charleston	Matt	Pendleton	Geospatial Analyst	The Baldwin Group (NOAA Coastal Services Center)	2016-09-29	Matt and others at NOAA talked about Charleston's frequent flooding problems. The city floods about 25 times per year. He mentioned a neighborhood that frequently floods on the southwestern tip of the Charleston peninsula and noted that homeowners have been trying (unsuccessfully) to sell their homes there. Charleston has taken measures to reduce the impacts of floods in the city (pumping, etc.).
12	New Jersey	Cape May	West Wildwood	Christopher	Ridings	Borough Administrator	Borough of West Wildwood	2017-05-26	Christopher reported that recent upgrades to the bulkheads in West Wildwood have reduced local flooding issues substantially. Without these measures (put into place in 2016 as per this article http://www.pressofatlanticcity.com/news/west-wildwood-races-to-rebuild-damaged-bulkheads/article_44afae3a-cebd-11e5-8e8b-ff047f4bf3b2.html), he said that the flooding would have at least the extent and freq…
13	New York	Queens	Broad Channel	Dan	Mundy Sr.	Lifelong resident and local activist		2016-11-07	Dan reported that high tide flooding often occurs for 3-5 days around a high tide, and definitely happens more than a dozen times per year. His home frequently has 2-3 inches of water out front, though it has been up to 2 feet at times. He reported that about 50 people in the community are affected by such flooding. The community lobbied for a received funds to raise roads, and that project is no…
14	Maryland	Somerset	Several towns	Mary	Phillips	Zoning Specialist, Certified Floodplain Manager	Somerset County Government	2017-05-27	May confirmed that the flooding we mapped for Lawsons and Crisfield was accurate. On Smith Island, Asbury, and Dames Quarter, she reported that our estimates of extent were a bit high (they see 10-15% of land area flooding) but frequency was about right at twice per month.
15	Georgia	Chatham	Tybee Island	Paul	Wolf	Tybee Council Member (Former)		2016-11-07	Paul reported that in 2015, Highway 80, which is the only road connecting Tybee Island to the mainland, was underwater 15 days. They see sunny day flooding particularly on the southwestern portion of the island. The area is considering elevating electronics on their wells, installing tide gates. They ahve a climate adapatation plan in place that identifies vulnerable assets. There are plans to wi…
