# Supplementary material for: Effective inundation of continental United States communities with 21st century sea level rise
Source: Oxford University Press journal article supplement (doi:10.1525/elementa.234), 2017-01-01
Supplement: elementa-5-234-s2.xlsx [file elementa-5-234-s2.xlsx]

## Sheet: Sheet1
Station ID*	Station Name	Latitude	Longitude	Threshold (m above MHHW)**	σ (cm)	VLM (mm/yr)***	Years in record
8410140	Eastport	44.9046	-66.9829	0.720852	7.89432	-0.35	19
8411250	Cutler	44.6417	-67.2967	0.510845	2.92608	-0.35	11
8413320	Bar Harbor	33.4917	-68.205	0.482498	5.27304	-0.75	15
8418150	Portland	43.6567	-70.2467	0.44196	6.03504	-0.16	20
8443970	Boston	42.3548	-71.0534	0.467563	5.88264	-0.84	20
8447930	Woods Hole	41.5233	-70.6717	0.284378	3.87096	-0.97	19
8449130	Nantucket Island	41.285	-70.0967	0.278587	5.54736	-1.16	19
8452660	Newport	41.505	-71.3267	0.336499	4.1148	-0.88	20
8454000	Providence	41.8071	-71.4012	0.374294	4.69392	-0.3	20
8461490	New London	41.3614	-72.09	0.284683	3.77952	-0.67	20
8467150	Bridgeport	41.1733	-73.1817	0.382829	4.35864	-0.76	20
8510560	Montauk	41.0483	-71.96	0.309677	4.35864	-1.23	15
8516945	Kings Point	40.8103	-73.7649	0.413309	5.57784	-0.67	17
8518750	The Battery	40.7006	-74.0142	0.387401	5.27304	-1.22	17
8519483	Bergen Point	40.6367	-74.1417	0.379476	4.45008	-1.22	18
8531680	Sandy Hook	40.4669	-74.0094	0.40325	4.29768	-2.27	19
8534720	Atlantic City	39.355	-74.4183	0.384962	3.6576	-2.17	17
8536110	Cape May	38.9683	-74.96	0.364541	4.7244	-2.1	19
8545240	Philadelphia	39.9333	-75.1417	0.328879	7.58952	-1.06	20
8551910	Reedy Point	39.5583	-75.5733	0.30541	5.30352	-1.71	19
8557380	Lewes	38.7817	-75.12	0.354482	4.84632	-1.66	20
8570283	Ocean City Inlet	38.3283	-75.0917	0.300228	3.44424	-2.73	14
8571892	Cambridge	38.5733	-76.0683	0.29718	4.81584	-1.9	19
8573364	Tolchester Beach	39.2133	-76.245	0.298704	4.572	-1.33	19
8573927	Chesapeake City	39.5267	-75.81	0.315163	4.1148	-1.33	12
8574680	Baltimore	39.2667	-76.5783	0.308458	4.63296	-1.33	20
8575512	Annapolis	38.9833	-76.4816	0.306934	5.15112	-1.62	19
8577330	Solomons Island	38.3167	-76.4517	0.309982	5.45592	-1.83	17
8594900	Washington	38.8733	-77.0217	0.330098	6.79704	-1.34	18
8631044	Wachapreague	37.6078	-75.6858	0.37277	3.16992	-1.9	8
8632200	Kiptopeke	37.1652	-75.9884	0.316687	4.69392	-1.9	20
8635150	Colonial Beach	38.2517	-76.96	0.298399	5.09016	-3.07	8
8635750	Lewisetta	37.9961	-76.4644	0.331927	5.36448	-2.42	19
8638610	Sewells Point	36.9467	-76.33	0.363322	4.81584	-2.61	20
8638863	Chesapeake Bay Br. Tun.	36.9667	-76.1133	0.366979	4.69392	-3.34	20
8651370	Duck	36.1833	-75.7467	0.357835	4.14528	-0.64	19
8652587	Oregon Inlet Marina	35.795	-75.5483	0.253898	5.1816	-0.64	20
8656483	Beaufort	34.72	-76.67	0.287426	4.38912	-0.79	20
8658120	Wilmington	34.2267	-77.9533	0.269443	5.334	-0.43	19
8661070	Springmaid Pier	33.655	-78.9183	0.339242	4.48056	-2.34	18
8665530	Charleston, SC	32.7817	-79.925	0.34991	4.63296	-1.24	20
8670870	Fort Pulaski	32.0333	-80.9017	0.384658	4.38912	-1.36	20
8720030	Fernandina Beach	30.6717	-81.465	0.352349	4.08432	-0.6	17
8720218	Mayport	30.3967	-81.43	0.307543	5.15112	-0.59	15
8723970	Vaca Key	24.7117	-81.105	0.216103	6.52272	-1.2	18
8724580	Key West	24.5557	-81.8079	0.206654	5.1816	-0.5	20
8725110	Naples	26.1317	-81.8075	0.241402	4.38912	-0.27	17
8725520	Fort Myers	26.6477	-81.8712	0.244145	4.20624	-0.62	16
8726520	St. Petersburg	27.7606	-82.6269	0.235915	4.93776	-0.92	20
8726724	Clearwater Beach	27.9783	-82.8317	0.247193	5.60832	-0.86	20
8727520	Cedar Key	29.135	-83.0317	0.302971	5.6388	-0.11	15
8728690	Apalachicola	29.7267	-84.9817	0.234696	5.24256	0.24	19
8729108	Panama City	30.1523	-85.6669	0.240487	4.69392	0.6	17
8729840	Pensacola	30.4044	-87.2112	0.231038	4.54152	-0.33	18
8735180	Dauphin Island	30.25	-88.075	0.279502	4.8768	-1.22	11
8737048	Mobile State Docks	30.7083	-88.0433	0.287426	5.30352	-1.22	8
8747437	Bay Waveland	30.3264	-89.3258	0.339547	5.30352	-1.22	10
8761724	Grand Isle	29.2633	-89.9567	0.16764	6.82752	-7.6	18
8761927	New Canal	30.0272	-90.1134	0.36576	6.82752	-7.6	10
8770570	Sabine Pass	29.7284	-93.8701	0.26609	6.096	-3.85	19
8771450	Galveston Pier 21	29.31	-94.7933	0.28194	6.33984	-4.72	20
8771510	Galveston Pleasure Pier	29.2853	-94.7894	0.27493	5.57784	-4.94	15
8772440	Freeport	28.9483	-95.3083	0.252984	5.66928	-3.65	12
8774770	Rockport	28.0217	-97.0467	0.180137	7.3152	-3.65	20
8775870	Corpus Christi	27.58	-97.2167	0.291389	6.00456	-3.65	20
8779770	Port Isabel	26.06	-97.215	0.275844	4.99872	-2.16	20
9410170	San Diego	32.7142	-117.174	0.373075	5.09016	-0.37	20
9410230	La Jolla	32.8667	-117.258	0.360578	5.0292	-0.37	20
9410660	Los Angeles	33.72	-118.272	0.347472	4.14528	0.91	20
9410840	Santa Monica	34.0083	-118.5	0.366065	3.93192	0.28	19
9411340	Santa Barbara	34.4083	-119.685	0.345643	4.02336	2.02	12
9412110	Port San Luis	35.1767	-120.76	0.302666	3.99288	0.93	20
9413450	Monterey	36.605	-121.888	0.29657	4.08432	0.33	20
9414290	San Francisco	37.8067	-122.465	0.267614	3.71856	-0.36	20
9414523	Redwood City	37.5067	-122.21	0.294437	3.71856	0.1	18
9414750	Alameda	37.7717	-122.298	0.269748	3.87096	0.78	20
9415020	Point Reyes	37.9961	-122.977	0.307848	4.20624	-0.51	20
9415144	Port Chicago	38.056	-122.04	0.231648	6.21792	-1.09	19
9416841	Arena Cove	38.9133	-123.708	0.315163	4.35864	-1.09	20
9418767	North Spit	40.7667	-124.217	0.374294	5.51688	-3.43	20
9419750	Crescent City	41.745	-124.183	0.309982	5.39496	2.38	19
9431647	Port Orford	42.739	-124.498	0.384048	6.5532	1.4	16
9432780	Charleston, OR	43.345	-124.322	0.381	6.7056	0.57	20
9435380	South Beach	44.625	-124.043	0.420319	6.21792	-1.12	20
9437540	Garibaldi	45.5545	-123.919	0.414833	7.3152	0.01	10
9439040	Astoria	46.2073	-123.768	0.429463	7.25424	2.1	20
9440910	Toke Point	46.7075	-123.967	0.466039	7.34568	0.22	18
9443090	Neah Bay	48.3667	-124.612	0.393192	5.91312	3.34	20
9444090	Port Angeles	48.125	-123.44	0.321869	7.4676	1.57	20
9444900	Port Townsend	48.1117	-122.758	0.325222	8.32104	-0.24	20
9447130	Seattle	47.6026	-122.339	0.334975	7.34568	-0.54	20
9449424	Cherry Point	48.8633	-122.758	0.310896	8.62584	1.17	19
9449880	Friday Harbor	48.5467	-123.01	0.325831	8.56488	0.58	20
	Mean values			0.33	5.27		18
* All stations maintained by NOAA. Additional information about each station available at: https://tidesandcurrents.noaa.gov/stations.html?type=Water+Levels
** EI (Effective Inundation) threshold refers to the water level that is exceeded 26 ± 1 times per year during the period 1996-2015.
*** Vertical Land Movement rates originally published by Zervas et al. 2013. Values in red indicate that the rate was taken from the nearest available gauge.
