# Supplementary material for: Effective inundation of continental United States communities with 21st century sea level rise
Source: Oxford University Press journal article supplement (doi:10.1525/elementa.234), 2017-01-01
Supplement: elementa-5-234-s3.xlsx [file elementa-5-234-s3.xlsx]

## Sheet: README
This file contains supplementary data for Dahl et al: "Effective inundation of continental United States communities with 21st century sea level rise"
Abbreviations:
EIC	effectively inundated community; Communities are defined as Census county subdivisions; communities with >10% of livable land area (exluding wetlands, areas below MHHW, and leveed areas) inundated 26 times or more per year are considered effectively inundated
NCAH	NCA Highest sea level rise scenario
NCAI	NCA Intermediate-High sea level rise scenario
NCAL	NCA Intermediate-Low sea level rise scenario
Contents:
Sheet #	Description
1	Summary of results: Number of EICs for each year and scenario analyzed
2	Summary of the number of EICs for each state for all years and scenarios analyzed
3 through 16	Lists of EICs for each year and scenario analyzed, one year/scenario combination per sheet
17	Effective Inundation thresholds and number of years in records for tide gauges included in this study

## Sheet: 1. Summary
Total Municipalities in Cohort
Year	High	Int-High	Int-Low
2006	91	91	91
2030	178
2035		167
2045	265
2060	360	272	183
2070	427
2080	523	365
2090	600
2100	668	489	290

## Sheet: 2. State Summary All Scenarios
		NCAI				NCAH							NCAL
State	2006	2035	2060	2080	2100	2030	2045	2060	2070	2080	2090	2100	2060	2100
AL	0	0	0	1	1	0	0	1	1	1	1	2	0	0
CT	0	0	0	0	1	0	0	0	1	1	3	5	0	0
DE	0	0	1	3	5	0	1	3	5	5	6	7	0	1
DC	0	0	0	0	0	0	0	0	0	0	0	0	0	0
FL	3	5	18	31	58	5	18	32	48	69	85	90	5	19
GA	2	4	6	7	10	4	6	7	7	14	17	18	4	6
LA	59	95	105	114	131	89	101	110	116	129	139	146	97	112
ME	0	0	0	1	1	0	0	1	1	2	3	4	0	0
MD	12	22	27	35	39	23	27	35	37	41	44	51	23	30
MA	0	0	5	9	18	1	5	9	13	18	20	28	0	5
MS	0	0	0	1	2	0	0	1	2	2	4	5	0	0
NH	0	0	0	0	1	0	0	0	0	2	2	4	0	0
NJ	7	21	55	74	103	26	55	73	87	110	120	131	27	58
NY	0	0	0	3	4	0	0	3	4	6	9	14	0	1
NC	6	13	25	43	49	20	26	43	47	53	61	63	15	26
PA	0	0	0	0	0	0	0	0	0	0	0	0	0	0
RI	0	0	0	0	1	0	0	0	0	2	3	3	0	0
SC	0	2	12	18	19	3	10	18	19	20	20	22	3	12
TX	1	2	8	11	17	3	7	10	15	18	20	26	5	10
VA	1	3	8	11	24	4	7	11	20	25	34	38	4	8
CA	0	0	0	1	3	0	0	1	2	3	6	7	0	0
OR	0	0	0	0	0	0	0	0	0	0	0	0	0	0
WA	0	0	2	2	2	0	2	2	2	2	3	4	0	2

## Sheet: 3. Present
Year	Projection	State	County Code	Name	Pct Inundated		State	Number
Present	NCAH	FL	87	Middle Keys	12.4		AL	0
Present	NCAH	FL	87	Lower Keys	11.4		CT	0
Present	NCAH	FL	87	Cape Sable	10.2		DE	0
Present	NCAH	GA	127	Brunswick	16		DC	0
Present	NCAH	GA	127	St. Simons	10.1		FL	3
Present	NCAH	LA	57	9	97.8		GA	2
Present	NCAH	LA	89	4	90.5		LA	59
Present	NCAH	LA	75	6	85.8		ME	0
Present	NCAH	LA	75	3	76.6		MD	12
Present	NCAH	LA	75	5	63.1		MA	0
Present	NCAH	LA	87	A	58.5		MS	0
Present	NCAH	LA	75	9	56		NH	0
Present	NCAH	LA	75	7	54.7		NJ	7
Present	NCAH	LA	51	1	54.5		NY	0
Present	NCAH	LA	57	5	54.3		NC	6
Present	NCAH	LA	57	8	50.6		PA	0
Present	NCAH	LA	101	3	46.8		RI	0
Present	NCAH	LA	57	7	45.4		SC	0
Present	NCAH	LA	75	4	44.1		TX	1
Present	NCAH	LA	75	8	43		VA	1
Present	NCAH	LA	57	6	41		CA	0
Present	NCAH	LA	23	4	40.9		OR	0
Present	NCAH	LA	89	3	39.7		WA	0
Present	NCAH	LA	101	4	39
Present	NCAH	LA	87	B	38		total	91
Present	NCAH	LA	23	5	37.6
Present	NCAH	LA	57	3	36.9		States with 0	15
Present	NCAH	LA	101	7	35.8		average per state	3.95652
Present	NCAH	LA	7	1	34.3		median per state	0
Present	NCAH	LA	95	1	30.7
Present	NCAH	LA	23	6	30.3
Present	NCAH	LA	47	11	30
Present	NCAH	LA	113	13	29.8
Present	NCAH	LA	109	7	29.2
Present	NCAH	LA	75	1	28.8
Present	NCAH	LA	113	9	27.5
Present	NCAH	LA	89	5	26.9
Present	NCAH	LA	23	1	25.9
Present	NCAH	LA	109	2	24.8
Present	NCAH	LA	23	3	24.3
Present	NCAH	LA	51	3	23.8
Present	NCAH	LA	57	2	23.8
Present	NCAH	LA	113	14	23.3
Present	NCAH	LA	103	13	23.2
Present	NCAH	LA	51	4	22.2
Present	NCAH	LA	109	8	20.4
Present	NCAH	LA	7	6	20.1
Present	NCAH	LA	101	6	19.8
Present	NCAH	LA	7	3	19.5
Present	NCAH	LA	23	2	18
Present	NCAH	LA	101	8	18
Present	NCAH	LA	71	New Orleans	17.7
Present	NCAH	LA	109	6	17.4
Present	NCAH	LA	23	7	15
Present	NCAH	LA	51	5	14.7
Present	NCAH	LA	101	1	14.5
Present	NCAH	LA	109	9	13.8
Present	NCAH	LA	93	7	11.7
Present	NCAH	LA	89	2	11.6
Present	NCAH	LA	57	1	11.5
Present	NCAH	LA	57	4	10.9
Present	NCAH	LA	109	5	10.8
Present	NCAH	LA	99	1	10.4
Present	NCAH	LA	5	6	10.1
Present	NCAH	MD	19	10, Straits	68.5
Present	NCAH	MD	19	5, Lakes	66.1
Present	NCAH	MD	19	11, Drawbridge	42.5
Present	NCAH	MD	39	12, Asbury	27.1
Present	NCAH	MD	19	16, Madison	23
Present	NCAH	MD	19	4, Taylors Island	21.9
Present	NCAH	MD	19	18, Elliott	17.3
Present	NCAH	MD	19	6, Hoopers Island	14.3
Present	NCAH	MD	39	11, Dames Quarter	14.1
Present	NCAH	MD	39	10, Smith Island	13.8
Present	NCAH	MD	39	8, Lawsons	10.4
Present	NCAH	MD	39	7, Crisfield	10.3
Present	NCAH	NC	55	East Lake	70.3
Present	NCAH	NC	95	Lake Mattamuskeet	60.2
Present	NCAH	NC	95	Fairfield	48.3
Present	NCAH	NC	95	Lake Landing	41.4
Present	NCAH	NC	55	Croatan	41.2
Present	NCAH	NC	31	Portsmouth	22.4
Present	NCAH	NJ	9	West Wildwood	55.2
Present	NCAH	NJ	33	Elsinboro	30.4
Present	NCAH	NJ	3	Moonachie	26.8
Present	NCAH	NJ	3	Teterboro	25.7
Present	NCAH	NJ	33	Salem	25.4
Present	NCAH	NJ	3	Carlstadt	14.8
Present	NCAH	NJ	3	Little Ferry	11.3
Present	NCAH	TX	167	Bolivar Peninsula	10.8
Present	NCAH	VA	1	1	11.9

## Sheet: 4. 2030 NCAH
Year	Projection	State	County Code	Name	Pct Inundated		State	Number
2030	NCAH	FL	87	Cape Sable	22.2		AL	0
2030	NCAH	FL	87	Key West	13.6		CT	0
2030	NCAH	FL	87	Lower Keys	32.2		DE	0
2030	NCAH	FL	86	Key Biscayne	12		DC	0
2030	NCAH	FL	87	Middle Keys	21.6		FL	5
2030	NCAH	GA	127	Jekyll Island	19.4		GA	4
2030	NCAH	GA	51	Tybee Island-Wilmington Island	14.3		LA	89
2030	NCAH	GA	127	Brunswick	19.4		ME	0
2030	NCAH	GA	127	St. Simons	16.7		MD	23
2030	NCAH	LA	45	10	20.7		MA	1
2030	NCAH	LA	45	12	15.3		MS	0
2030	NCAH	LA	87	B	63.4		NH	0
2030	NCAH	LA	87	A	67.1		NJ	26
2030	NCAH	LA	87	E	11.2		NY	0
2030	NCAH	LA	113	13	50.9		NC	20
2030	NCAH	LA	101	5	14.1		PA	0
2030	NCAH	LA	101	6	24.3		RI	0
2030	NCAH	LA	101	7	48.3		SC	3
2030	NCAH	LA	7	2	26.2		TX	3
2030	NCAH	LA	7	3	55.5		VA	4
2030	NCAH	LA	7	7	14.9		CA	0
2030	NCAH	LA	7	9	44.9		OR	0
2030	NCAH	LA	47	11	31.6		WA	0
2030	NCAH	LA	51	1	85
2030	NCAH	LA	51	4	30.6		total	178
2030	NCAH	LA	51	5	22.4
2030	NCAH	LA	23	6	65.6		States with 0	12
2030	NCAH	LA	101	2	14.2		average per state	8.09091
2030	NCAH	LA	101	3	74.4		median per state	0
2030	NCAH	LA	101	8	37.4
2030	NCAH	LA	103	4	13.5
2030	NCAH	LA	103	13	36.4
2030	NCAH	LA	113	9	47.4
2030	NCAH	LA	5	2	28.4
2030	NCAH	LA	57	1	29.1
2030	NCAH	LA	57	4	39.1
2030	NCAH	LA	57	6	68.2
2030	NCAH	LA	57	9	136.6
2030	NCAH	LA	57	2	71.7
2030	NCAH	LA	57	3	77.6
2030	NCAH	LA	113	8	17.4
2030	NCAH	LA	113	14	39.6
2030	NCAH	LA	95	2	27.2
2030	NCAH	LA	95	3	24.5
2030	NCAH	LA	95	4	16.6
2030	NCAH	LA	109	6	50.1
2030	NCAH	LA	109	9	52.4
2030	NCAH	LA	109	7	65.8
2030	NCAH	LA	109	1	21.2
2030	NCAH	LA	109	3	18.1
2030	NCAH	LA	109	5	21
2030	NCAH	LA	101	1	32.1
2030	NCAH	LA	101	4	64.3
2030	NCAH	LA	23	4	73.2
2030	NCAH	LA	23	7	36.9
2030	NCAH	LA	23	1	57.2
2030	NCAH	LA	23	5	76.1
2030	NCAH	LA	23	2	51.6
2030	NCAH	LA	23	3	51.1
2030	NCAH	LA	89	1	46.4
2030	NCAH	LA	89	3	67.7
2030	NCAH	LA	75	3	90.5
2030	NCAH	LA	75	4	44.3
2030	NCAH	LA	75	8	55.5
2030	NCAH	LA	75	7	61.4
2030	NCAH	LA	75	6	93.3
2030	NCAH	LA	89	7	28.2
2030	NCAH	LA	89	5	44.1
2030	NCAH	LA	109	2	65.3
2030	NCAH	LA	109	4	33.1
2030	NCAH	LA	109	8	48.2
2030	NCAH	LA	51	3	31.8
2030	NCAH	LA	93	1	14.9
2030	NCAH	LA	93	3	19.5
2030	NCAH	LA	93	6	40
2030	NCAH	LA	93	7	49.6
2030	NCAH	LA	95	1	58.5
2030	NCAH	LA	99	1	16.1
2030	NCAH	LA	89	2	20.6
2030	NCAH	LA	89	4	96.6
2030	NCAH	LA	53	13	16.5
2030	NCAH	LA	45	13	23.6
2030	NCAH	LA	7	1	39.4
2030	NCAH	LA	7	4	36.7
2030	NCAH	LA	7	6	45.1
2030	NCAH	LA	93	5	30.4
2030	NCAH	LA	57	5	75.9
2030	NCAH	LA	57	7	75
2030	NCAH	LA	57	8	88.8
2030	NCAH	LA	75	1	38.7
2030	NCAH	LA	75	5	67.7
2030	NCAH	LA	75	9	71.2
2030	NCAH	LA	93	4	34.7
2030	NCAH	LA	5	6	35
2030	NCAH	LA	5	9	12.9
2030	NCAH	LA	71	New Orleans	32.3
2030	NCAH	LA	7	5	25.5
2030	NCAH	LA	7	8	18.5
2030	NCAH	MD	19	6, Hoopers Island	54.5
2030	NCAH	MD	19	5, Lakes	94.3
2030	NCAH	MD	19	8, Neck	45.7
2030	NCAH	MD	19	17, Salem	14.5
2030	NCAH	MD	19	18, Elliott	29
2030	NCAH	MD	19	9, Church Creek	25.8
2030	NCAH	MD	19	13, Bucktown	13.5
2030	NCAH	MD	19	4, Taylors Island	60.3
2030	NCAH	MD	19	10, Straits	93.3
2030	NCAH	MD	19	11, Drawbridge	61.8
2030	NCAH	MD	19	16, Madison	80.6
2030	NCAH	MD	39	3, Brinkleys	18.9
2030	NCAH	MD	39	8, Lawsons	33.8
2030	NCAH	MD	45	17, Westside	13.1
2030	NCAH	MD	37	9, St. George Island	39
2030	NCAH	MD	39	2, St. Peters	35.9
2030	NCAH	MD	39	12, Asbury	80.2
2030	NCAH	MD	39	6, Fairmount	38.7
2030	NCAH	MD	39	7, Crisfield	62
2030	NCAH	MD	39	9, Tangier	11.1
2030	NCAH	MD	39	10, Smith Island	41.6
2030	NCAH	MD	39	11, Dames Quarter	35
2030	NCAH	MD	39	14, Deal Island	21.9
2030	NCAH	MA	25	Winthrop Town	10.5
2030	NCAH	NJ	33	Lower Alloways Creek	11.7
2030	NCAH	NJ	3	Little Ferry	35.7
2030	NCAH	NJ	3	Moonachie	59.8
2030	NCAH	NJ	3	Teterboro	42.7
2030	NCAH	NJ	29	Seaside Park	12.6
2030	NCAH	NJ	3	Carlstadt	26.9
2030	NCAH	NJ	29	Long Beach	12.9
2030	NCAH	NJ	29	Tuckerton	16.1
2030	NCAH	NJ	9	North Wildwood	17.8
2030	NCAH	NJ	9	Ocean City	19.2
2030	NCAH	NJ	9	West Wildwood	79.9
2030	NCAH	NJ	9	Wildwood	14.8
2030	NCAH	NJ	29	Bay Head	24.5
2030	NCAH	NJ	29	Beach Haven	18.1
2030	NCAH	NJ	29	Mantoloking	13.1
2030	NCAH	NJ	29	Ship Bottom	12.5
2030	NCAH	NJ	33	Pennsville	17.2
2030	NCAH	NJ	33	Salem	34.2
2030	NCAH	NJ	33	Elsinboro	43.4
2030	NCAH	NJ	25	Highlands	11.5
2030	NCAH	NJ	25	Manasquan	12.3
2030	NCAH	NJ	25	Monmouth Beach	18.6
2030	NCAH	NJ	25	Sea Bright	24.6
2030	NCAH	NJ	1	Brigantine	10.5
2030	NCAH	NJ	1	Longport	11.1
2030	NCAH	NJ	1	Ventnor City	11.5
2030	NCAH	NC	55	East Lake	85.9
2030	NCAH	NC	29	Shiloh	10.8
2030	NCAH	NC	95	Lake Mattamuskeet	78
2030	NCAH	NC	95	Ocracoke	28.4
2030	NCAH	NC	95	Swan Quarter	47.1
2030	NCAH	NC	177	Alligator	29.8
2030	NCAH	NC	95	Lake Landing	81.1
2030	NCAH	NC	177	Columbia	16.7
2030	NCAH	NC	177	Gum Neck	29.8
2030	NCAH	NC	31	Sea Level	11.5
2030	NCAH	NC	53	Fruitville	12.2
2030	NCAH	NC	95	Currituck	11.9
2030	NCAH	NC	95	Fairfield	62.4
2030	NCAH	NC	137	4	18
2030	NCAH	NC	139	Salem	10.6
2030	NCAH	NC	55	Croatan	62.6
2030	NCAH	NC	31	Cedar Island	10.8
2030	NCAH	NC	31	Harkers Island	12.2
2030	NCAH	NC	31	Marshallberg	13.3
2030	NCAH	NC	31	Portsmouth	44.6
2030	NCAH	SC	19	Edisto Island	17.8
2030	NCAH	SC	19	Kiawah Island-Seabrook Island	13.9
2030	NCAH	SC	29	Green Pond	10.6
2030	NCAH	TX	245	Sabine Pass	13.7
2030	NCAH	TX	167	Galveston	10.6
2030	NCAH	TX	167	Bolivar Peninsula	25.6
2030	NCAH	VA	115	Chesapeake	12.3
2030	NCAH	VA	1	1	38.7
2030	NCAH	VA	735	Poquoson	12.7
2030	NCAH	VA	73	York	10.1

## Sheet: 5. 2035 NCAI
Year	Projection	State	County Code	Name	Pct Inundated		State	Number
2035	NCAI	FL	87	Lower Keys	28		AL	0
2035	NCAI	FL	87	Cape Sable	19.9		CT	0
2035	NCAI	FL	87	Middle Keys	19.2		DE	0
2035	NCAI	FL	87	Key West	10		DC	0
2035	NCAI	FL	86	Key Biscayne	10		FL	5
2035	NCAI	GA	127	Brunswick	18.9		GA	4
2035	NCAI	GA	127	Jekyll Island	18.1		LA	95
2035	NCAI	GA	127	St. Simons	15.6		ME	0
2035	NCAI	GA	51	Tybee Island-Wilmington Island	12.8		MD	22
2035	NCAI	LA	57	9	136.9		MA	0
2035	NCAI	LA	89	4	97.7		MS	0
2035	NCAI	LA	75	6	93.1		NH	0
2035	NCAI	LA	75	3	92.1		NJ	21
2035	NCAI	LA	57	8	89.6		NY	0
2035	NCAI	LA	57	3	87.2		NC	13
2035	NCAI	LA	51	1	85.3		PA	0
2035	NCAI	LA	57	2	81.9		RI	0
2035	NCAI	LA	101	3	81.1		SC	2
2035	NCAI	LA	57	5	79.7		TX	2
2035	NCAI	LA	57	7	78.7		VA	3
2035	NCAI	LA	23	5	75.6		CA	0
2035	NCAI	LA	23	4	73.4		OR	0
2035	NCAI	LA	57	6	72.1		WA	0
2035	NCAI	LA	109	2	71.5
2035	NCAI	LA	75	9	70.3		total	167
2035	NCAI	LA	109	7	69.4
2035	NCAI	LA	89	3	69		States with 0	13
2035	NCAI	LA	87	A	68.2		average per state	7.59091
2035	NCAI	LA	75	5	68.2		median per state	0
2035	NCAI	LA	87	B	66.2
2035	NCAI	LA	101	4	65.9
2035	NCAI	LA	7	3	64.5
2035	NCAI	LA	23	6	64.5
2035	NCAI	LA	95	1	62.6
2035	NCAI	LA	75	7	61
2035	NCAI	LA	7	9	58.1
2035	NCAI	LA	93	7	57.9
2035	NCAI	LA	89	1	56.3
2035	NCAI	LA	109	9	55.6
2035	NCAI	LA	23	1	55.3
2035	NCAI	LA	109	6	55.1
2035	NCAI	LA	75	8	55
2035	NCAI	LA	7	6	52.1
2035	NCAI	LA	113	13	51.7
2035	NCAI	LA	23	3	50.9
2035	NCAI	LA	23	2	50.6
2035	NCAI	LA	101	7	50.4
2035	NCAI	LA	109	8	50.4
2035	NCAI	LA	93	6	50.2
2035	NCAI	LA	113	9	48.6
2035	NCAI	LA	89	5	46.6
2035	NCAI	LA	101	8	46.2
2035	NCAI	LA	7	4	46.1
2035	NCAI	LA	57	4	45.9
2035	NCAI	LA	5	6	45.6
2035	NCAI	LA	75	4	44.6
2035	NCAI	LA	7	1	42.9
2035	NCAI	LA	93	4	42.5
2035	NCAI	LA	113	14	40.4
2035	NCAI	LA	93	5	40.2
2035	NCAI	LA	109	4	38.8
2035	NCAI	LA	75	1	38.3
2035	NCAI	LA	103	13	38
2035	NCAI	LA	89	7	37.5
2035	NCAI	LA	5	2	36.9
2035	NCAI	LA	23	7	36.5
2035	NCAI	LA	7	2	35.7
2035	NCAI	LA	51	4	34.5
2035	NCAI	LA	71	New Orleans	34.4
2035	NCAI	LA	101	1	34
2035	NCAI	LA	51	3	33.9
2035	NCAI	LA	57	1	32.7
2035	NCAI	LA	47	11	31.9
2035	NCAI	LA	93	3	31.4
2035	NCAI	LA	95	2	31.3
2035	NCAI	LA	7	5	31.3
2035	NCAI	LA	95	3	28.6
2035	NCAI	LA	7	8	26.9
2035	NCAI	LA	51	5	25.9
2035	NCAI	LA	101	6	25.8
2035	NCAI	LA	45	13	25.6
2035	NCAI	LA	109	1	23.7
2035	NCAI	LA	109	5	23.4
2035	NCAI	LA	109	3	23.1
2035	NCAI	LA	45	10	22.4
2035	NCAI	LA	89	2	21.9
2035	NCAI	LA	7	7	21.5
2035	NCAI	LA	95	4	20.6
2035	NCAI	LA	93	1	20.2
2035	NCAI	LA	113	8	18.4
2035	NCAI	LA	5	9	17.9
2035	NCAI	LA	103	4	17.4
2035	NCAI	LA	99	1	17.1
2035	NCAI	LA	45	12	16.9
2035	NCAI	LA	53	13	16.5
2035	NCAI	LA	101	5	16
2035	NCAI	LA	95	7	15.9
2035	NCAI	LA	101	2	15.6
2035	NCAI	LA	47	2	13.6
2035	NCAI	LA	93	2	12.2
2035	NCAI	LA	95	5	11.5
2035	NCAI	LA	87	E	11.1
2035	NCAI	LA	5	10	10.6
2035	NCAI	LA	89	6	10.1
2035	NCAI	MD	19	5, Lakes	92.6
2035	NCAI	MD	19	10, Straits	91.9
2035	NCAI	MD	39	12, Asbury	74.1
2035	NCAI	MD	19	16, Madison	73.8
2035	NCAI	MD	19	11, Drawbridge	59.7
2035	NCAI	MD	19	4, Taylors Island	54.9
2035	NCAI	MD	39	7, Crisfield	54.2
2035	NCAI	MD	19	6, Hoopers Island	48.2
2035	NCAI	MD	39	10, Smith Island	39.7
2035	NCAI	MD	19	8, Neck	39
2035	NCAI	MD	39	6, Fairmount	36.3
2035	NCAI	MD	37	9, St. George Island	34.4
2035	NCAI	MD	39	11, Dames Quarter	32.5
2035	NCAI	MD	39	2, St. Peters	31.3
2035	NCAI	MD	39	8, Lawsons	30.3
2035	NCAI	MD	19	18, Elliott	27.9
2035	NCAI	MD	19	9, Church Creek	22.1
2035	NCAI	MD	39	14, Deal Island	18.4
2035	NCAI	MD	39	3, Brinkleys	17.6
2035	NCAI	MD	19	17, Salem	13.7
2035	NCAI	MD	19	13, Bucktown	12.8
2035	NCAI	MD	45	17, Westside	11.7
2035	NCAI	NC	55	East Lake	80.2
2035	NCAI	NC	95	Lake Landing	75.6
2035	NCAI	NC	95	Lake Mattamuskeet	70.6
2035	NCAI	NC	95	Fairfield	59.1
2035	NCAI	NC	55	Croatan	56.2
2035	NCAI	NC	31	Portsmouth	39.7
2035	NCAI	NC	95	Swan Quarter	37
2035	NCAI	NC	177	Gum Neck	23.4
2035	NCAI	NC	95	Ocracoke	23.1
2035	NCAI	NC	177	Alligator	21.1
2035	NCAI	NC	137	4	14.6
2035	NCAI	NC	177	Columbia	10.8
2035	NCAI	NC	53	Fruitville	10
2035	NCAI	NJ	9	West Wildwood	78.2
2035	NCAI	NJ	3	Moonachie	54.6
2035	NCAI	NJ	33	Elsinboro	41.1
2035	NCAI	NJ	3	Teterboro	40.5
2035	NCAI	NJ	33	Salem	32.8
2035	NCAI	NJ	3	Little Ferry	31.2
2035	NCAI	NJ	3	Carlstadt	24.9
2035	NCAI	NJ	25	Sea Bright	21.2
2035	NCAI	NJ	29	Bay Head	20.4
2035	NCAI	NJ	25	Monmouth Beach	16.8
2035	NCAI	NJ	9	Ocean City	16.2
2035	NCAI	NJ	33	Pennsville	15.8
2035	NCAI	NJ	29	Tuckerton	15
2035	NCAI	NJ	9	North Wildwood	14.8
2035	NCAI	NJ	29	Beach Haven	13.6
2035	NCAI	NJ	9	Wildwood	11.3
2035	NCAI	NJ	25	Manasquan	11
2035	NCAI	NJ	33	Lower Alloways Creek	10.7
2035	NCAI	NJ	29	Long Beach	10.6
2035	NCAI	NJ	29	Seaside Park	10.2
2035	NCAI	NJ	25	Highlands	10
2035	NCAI	SC	19	Edisto Island	16.1
2035	NCAI	SC	19	Kiawah Island-Seabrook Island	11.1
2035	NCAI	TX	167	Bolivar Peninsula	24.2
2035	NCAI	TX	245	Sabine Pass	12.5
2035	NCAI	VA	1	1	34.2
2035	NCAI	VA	735	Poquoson	10.8
2035	NCAI	VA	115	Chesapeake	10.3

## Sheet: 6. 2045 NCAH
Year	Projection	State	County Code	Name	Pct Inundated		State	Number
2045	NCAH	DE	5	Lewes	10.6		AL	0
2045	NCAH	FL	71	Pine Island	11.1		CT	0
2045	NCAH	FL	71	Sanibel Island	18.7		DE	1
2045	NCAH	FL	71	Boca Grande	10		DC	0
2045	NCAH	FL	71	Estero Island	17.7		FL	18
2045	NCAH	FL	113	Navarre Beach	13		GA	6
2045	NCAH	FL	87	Cape Sable	48.9		LA	101
2045	NCAH	FL	87	Key West	38.1		ME	0
2045	NCAH	FL	87	Lower Keys	59.9		MD	27
2045	NCAH	FL	87	Upper Keys	21.9		MA	5
2045	NCAH	FL	86	Key Biscayne	25.5		MS	0
2045	NCAH	FL	86	Miami Beach	28.8		NH	0
2045	NCAH	FL	109	Ponte Vedra	11		NJ	55
2045	NCAH	FL	103	St. Pete Beach	14.8		NY	0
2045	NCAH	FL	111	Hutchinson Island	15.9		NC	26
2045	NCAH	FL	87	Middle Keys	38.9		PA	0
2045	NCAH	FL	9	Melbourne Shores-Floridana Beach	20		RI	0
2045	NCAH	FL	9	Merritt Island	18		SC	10
2045	NCAH	FL	9	Space Center	14.7		TX	7
2045	NCAH	GA	127	Jekyll Island	24.6		VA	7
2045	NCAH	GA	51	Tybee Island-Wilmington Island	22.6		CA	0
2045	NCAH	GA	51	Montgomery	17		OR	0
2045	NCAH	GA	51	Savannah	12.5		WA	2
2045	NCAH	GA	127	Brunswick	21.7
2045	NCAH	GA	127	St. Simons	20.9		total	265
2045	NCAH	LA	45	10	31.6
2045	NCAH	LA	45	12	22.2		States with 0	11
2045	NCAH	LA	87	B	71.9		average per state	11.9545
2045	NCAH	LA	87	A	70.6		median per state	0.5
2045	NCAH	LA	87	E	13.7
2045	NCAH	LA	53	1	12.1
2045	NCAH	LA	19	8	12.2
2045	NCAH	LA	113	13	66.3
2045	NCAH	LA	101	5	20.9
2045	NCAH	LA	101	6	31.1
2045	NCAH	LA	101	7	54.6
2045	NCAH	LA	7	2	50.5
2045	NCAH	LA	7	3	74.6
2045	NCAH	LA	7	7	35.5
2045	NCAH	LA	7	9	79.8
2045	NCAH	LA	47	11	33.4
2045	NCAH	LA	51	1	91.1
2045	NCAH	LA	51	4	40.6
2045	NCAH	LA	51	5	30.4
2045	NCAH	LA	23	6	80.7
2045	NCAH	LA	101	2	19.9
2045	NCAH	LA	101	3	85.7
2045	NCAH	LA	101	8	58.2
2045	NCAH	LA	103	4	23.2
2045	NCAH	LA	103	13	46.6
2045	NCAH	LA	113	9	61.1
2045	NCAH	LA	5	10	16.7
2045	NCAH	LA	5	2	47.5
2045	NCAH	LA	95	5	17.3
2045	NCAH	LA	57	1	41.8
2045	NCAH	LA	57	4	55.6
2045	NCAH	LA	57	6	80.2
2045	NCAH	LA	57	9	145.9
2045	NCAH	LA	57	2	90.9
2045	NCAH	LA	57	3	95.2
2045	NCAH	LA	19	12	10.6
2045	NCAH	LA	113	8	28.8
2045	NCAH	LA	113	14	51.1
2045	NCAH	LA	95	2	42.8
2045	NCAH	LA	95	3	32.8
2045	NCAH	LA	95	4	27.5
2045	NCAH	LA	95	7	22.1
2045	NCAH	LA	109	6	64.9
2045	NCAH	LA	109	9	68.7
2045	NCAH	LA	109	7	81.7
2045	NCAH	LA	109	1	32.5
2045	NCAH	LA	109	3	41
2045	NCAH	LA	109	5	31.1
2045	NCAH	LA	101	1	41.5
2045	NCAH	LA	101	4	70.3
2045	NCAH	LA	23	4	84.2
2045	NCAH	LA	23	7	49.1
2045	NCAH	LA	23	1	73.5
2045	NCAH	LA	23	5	88.6
2045	NCAH	LA	23	2	66.3
2045	NCAH	LA	23	3	62.7
2045	NCAH	LA	89	1	68.5
2045	NCAH	LA	89	3	69.5
2045	NCAH	LA	89	6	11.5
2045	NCAH	LA	75	3	95.9
2045	NCAH	LA	75	4	44.8
2045	NCAH	LA	75	8	61.7
2045	NCAH	LA	75	7	65.2
2045	NCAH	LA	75	6	95.5
2045	NCAH	LA	89	7	58.8
2045	NCAH	LA	89	5	49.8
2045	NCAH	LA	103	12	13.5
2045	NCAH	LA	109	2	79
2045	NCAH	LA	109	4	49.3
2045	NCAH	LA	109	8	59
2045	NCAH	LA	51	3	36.8
2045	NCAH	LA	63	8	10.9
2045	NCAH	LA	93	1	25.2
2045	NCAH	LA	93	3	49.1
2045	NCAH	LA	93	6	63.9
2045	NCAH	LA	93	7	70.4
2045	NCAH	LA	95	1	66.6
2045	NCAH	LA	99	1	18.6
2045	NCAH	LA	89	2	54.4
2045	NCAH	LA	89	4	98.9
2045	NCAH	LA	53	13	24.1
2045	NCAH	LA	45	13	37.6
2045	NCAH	LA	7	1	46.3
2045	NCAH	LA	7	4	61.9
2045	NCAH	LA	7	6	62.5
2045	NCAH	LA	93	5	51.9
2045	NCAH	LA	57	5	87.4
2045	NCAH	LA	57	7	86.5
2045	NCAH	LA	57	8	93
2045	NCAH	LA	103	14	12.2
2045	NCAH	LA	75	1	42.7
2045	NCAH	LA	75	5	72.2
2045	NCAH	LA	75	9	78
2045	NCAH	LA	93	2	19.2
2045	NCAH	LA	93	4	49.7
2045	NCAH	LA	5	6	59.1
2045	NCAH	LA	5	9	25.3
2045	NCAH	LA	47	2	24.8
2045	NCAH	LA	71	New Orleans	41.6
2045	NCAH	LA	7	5	39.9
2045	NCAH	LA	7	8	49.8
2045	NCAH	MA	25	Revere	14
2045	NCAH	MA	9	Nahant	12.7
2045	NCAH	MA	23	Hull	12.5
2045	NCAH	MA	25	Winthrop Town	14.9
2045	NCAH	MA	25	Chelsea	11
2045	NCAH	MD	47	7, Ocean City	13.6
2045	NCAH	MD	19	6, Hoopers Island	79.8
2045	NCAH	MD	19	5, Lakes	98.3
2045	NCAH	MD	19	8, Neck	78.2
2045	NCAH	MD	19	17, Salem	18.6
2045	NCAH	MD	19	18, Elliott	33.8
2045	NCAH	MD	19	9, Church Creek	47.8
2045	NCAH	MD	19	13, Bucktown	17.8
2045	NCAH	MD	19	4, Taylors Island	84.7
2045	NCAH	MD	19	7, Cambridge	15.2
2045	NCAH	MD	19	10, Straits	97.1
2045	NCAH	MD	19	11, Drawbridge	74.8
2045	NCAH	MD	19	16, Madison	97.8
2045	NCAH	MD	39	3, Brinkleys	26.9
2045	NCAH	MD	39	8, Lawsons	50.2
2045	NCAH	MD	39	13, Westover	10.4
2045	NCAH	MD	45	17, Westside	21.1
2045	NCAH	MD	47	3, Sinepuxent	15.9
2045	NCAH	MD	37	9, St. George Island	56.7
2045	NCAH	MD	39	2, St. Peters	49.9
2045	NCAH	MD	39	12, Asbury	95.4
2045	NCAH	MD	39	6, Fairmount	50.2
2045	NCAH	MD	39	7, Crisfield	88.4
2045	NCAH	MD	39	9, Tangier	23.4
2045	NCAH	MD	39	10, Smith Island	49
2045	NCAH	MD	39	11, Dames Quarter	48.1
2045	NCAH	MD	39	14, Deal Island	44.1
2045	NCAH	NC	55	East Lake	93.8
2045	NCAH	NC	55	Hatteras	14.3
2045	NCAH	NC	55	Kinnakeet	26.9
2045	NCAH	NC	29	Shiloh	17.5
2045	NCAH	NC	95	Lake Mattamuskeet	85.5
2045	NCAH	NC	95	Ocracoke	51.1
2045	NCAH	NC	95	Swan Quarter	79.5
2045	NCAH	NC	177	Alligator	55.2
2045	NCAH	NC	177	Scuppernong	20.6
2045	NCAH	NC	95	Lake Landing	89.7
2045	NCAH	NC	55	Nags Head	10.7
2045	NCAH	NC	177	Columbia	45.8
2045	NCAH	NC	177	Gum Neck	49.2
2045	NCAH	NC	31	Sea Level	45.5
2045	NCAH	NC	53	Fruitville	21.8
2045	NCAH	NC	95	Currituck	23.1
2045	NCAH	NC	95	Fairfield	70.4
2045	NCAH	NC	137	4	27.6
2045	NCAH	NC	53	Crawford	10.4
2045	NCAH	NC	139	Salem	22.7
2045	NCAH	NC	55	Croatan	75.3
2045	NCAH	NC	31	Cedar Island	19.7
2045	NCAH	NC	31	Harkers Island	25.4
2045	NCAH	NC	31	Marshallberg	43.7
2045	NCAH	NC	31	Portsmouth	60.8
2045	NCAH	NC	31	Stacy	11.9
2045	NCAH	NJ	33	Lower Alloways Creek	17.3
2045	NCAH	NJ	5	Burlington	20
2045	NCAH	NJ	33	Carneys Point	11.2
2045	NCAH	NJ	3	Little Ferry	56.4
2045	NCAH	NJ	3	Moonachie	78.3
2045	NCAH	NJ	3	Ridgefield	10.6
2045	NCAH	NJ	3	South Hackensack	17.3
2045	NCAH	NJ	3	Teterboro	72.3
2045	NCAH	NJ	29	Seaside Park	32
2045	NCAH	NJ	17	Secaucus	10.6
2045	NCAH	NJ	9	Avalon	17.3
2045	NCAH	NJ	3	Carlstadt	38.5
2045	NCAH	NJ	3	East Rutherford	15.2
2045	NCAH	NJ	17	Kearny	15.8
2045	NCAH	NJ	7	Brooklawn	11.2
2045	NCAH	NJ	7	Gloucester City	10.3
2045	NCAH	NJ	11	Downe	13.3
2045	NCAH	NJ	9	Sea Isle City	31.4
2045	NCAH	NJ	1	Atlantic City	26.8
2045	NCAH	NJ	29	Long Beach	32.2
2045	NCAH	NJ	29	Surf City	38.3
2045	NCAH	NJ	29	Tuckerton	19.7
2045	NCAH	NJ	9	Cape May Point	22.7
2045	NCAH	NJ	9	North Wildwood	37.5
2045	NCAH	NJ	9	Ocean City	39.1
2045	NCAH	NJ	9	Stone Harbor	23
2045	NCAH	NJ	9	West Cape May	16.1
2045	NCAH	NJ	9	West Wildwood	87.5
2045	NCAH	NJ	9	Wildwood	39.8
2045	NCAH	NJ	9	Wildwood Crest	13.4
2045	NCAH	NJ	15	National Park	11.7
2045	NCAH	NJ	29	Barnegat Light	16.4
2045	NCAH	NJ	29	Bay Head	47.1
2045	NCAH	NJ	29	Beach Haven	47.5
2045	NCAH	NJ	29	Harvey Cedars	31.9
2045	NCAH	NJ	29	Lavallette	32.1
2045	NCAH	NJ	29	Mantoloking	37.1
2045	NCAH	NJ	29	Ocean Gate	20.6
2045	NCAH	NJ	29	Point Pleasant Beach	20.9
2045	NCAH	NJ	29	Seaside Heights	30.3
2045	NCAH	NJ	29	Ship Bottom	48.5
2045	NCAH	NJ	33	Penns Grove	15.3
2045	NCAH	NJ	33	Pennsville	24.7
2045	NCAH	NJ	33	Salem	44.8
2045	NCAH	NJ	33	Elsinboro	55.8
2045	NCAH	NJ	25	Highlands	20.7
2045	NCAH	NJ	25	Manasquan	20.8
2045	NCAH	NJ	25	Monmouth Beach	33.9
2045	NCAH	NJ	25	Oceanport	10.3
2045	NCAH	NJ	25	Sea Bright	42.4
2045	NCAH	NJ	25	Union Beach	10.4
2045	NCAH	NJ	1	Brigantine	24.7
2045	NCAH	NJ	1	Longport	43.4
2045	NCAH	NJ	1	Margate City	23.9
2045	NCAH	NJ	1	Ventnor City	30.6
2045	NCAH	SC	19	McClellanville	10.1
2045	NCAH	SC	19	Edisto Island	26.7
2045	NCAH	SC	19	Charleston Central	15.6
2045	NCAH	SC	13	Sheldon	16.6
2045	NCAH	SC	19	Kiawah Island-Seabrook Island	40.2
2045	NCAH	SC	13	St. Helena Island	16.1
2045	NCAH	SC	19	Mount Pleasant	10.7
2045	NCAH	SC	19	James Island	16.7
2045	NCAH	SC	19	Johns Island	10.2
2045	NCAH	SC	29	Green Pond	16.4
2045	NCAH	TX	39	Brazosport	19.9
2045	NCAH	TX	167	La Marque-Hitchcock	11.9
2045	NCAH	TX	245	Sabine Pass	24
2045	NCAH	TX	167	Galveston	25.4
2045	NCAH	TX	167	Bolivar Peninsula	40.8
2045	NCAH	TX	355	Port Aransas	14.2
2045	NCAH	TX	71	Anahuac	14.8
2045	NCAH	VA	115	Westville	14
2045	NCAH	VA	115	Chesapeake	27.2
2045	NCAH	VA	1	1	67.2
2045	NCAH	VA	735	Poquoson	28.7
2045	NCAH	VA	103	3	12.8
2045	NCAH	VA	73	York	20.9
2045	NCAH	VA	1	4	14.7
2045	NCAH	WA	49	Naselle	11
2045	NCAH	WA	69	Puget Island	12.9

## Sheet: 7. 2060 NCAH
Year	Projection	State	County Code	Name	Pct Inundated		State	Number
2060	NCAH	AL	97	Bayou La Batre	12.1		AL	1
2060	NCAH	DE	1	Milford North	12.4		CT	0
2060	NCAH	DE	3	Wilmington	11.4		DE	3
2060	NCAH	DE	5	Lewes	16.1		DC	0
2060	NCAH	FL	81	Palmetto	15.3		FL	32
2060	NCAH	FL	31	Jacksonville Beaches	12.1		GA	7
2060	NCAH	FL	71	Pine Island	24.9		LA	110
2060	NCAH	FL	71	Sanibel Island	47.5		ME	1
2060	NCAH	FL	71	Boca Grande	41.9		MD	35
2060	NCAH	FL	127	South Peninsula	10.8		MA	9
2060	NCAH	FL	11	Hollywood	14.6		MS	1
2060	NCAH	FL	71	Estero Island	45.4		NH	0
2060	NCAH	FL	11	Fort Lauderdale	11.4		NJ	73
2060	NCAH	FL	11	Hallandale Beach	13.9		NY	3
2060	NCAH	FL	113	Navarre Beach	27.1		NC	43
2060	NCAH	FL	86	Homestead	14.8		PA	0
2060	NCAH	FL	87	Cape Sable	77.1		RI	0
2060	NCAH	FL	87	Key West	62.6		SC	18
2060	NCAH	FL	15	Grove City-Rotonda	11.5		TX	10
2060	NCAH	FL	87	Lower Keys	84.6		VA	11
2060	NCAH	FL	87	Upper Keys	40.4		CA	1
2060	NCAH	FL	115	Longboat Key	33.7		OR	0
2060	NCAH	FL	86	Key Biscayne	50.6		WA	2
2060	NCAH	FL	86	Miami Beach	58.5
2060	NCAH	FL	21	Marco Island	19.1		total	360
2060	NCAH	FL	37	Apalachicola	10.2
2060	NCAH	FL	109	Ponte Vedra	21.6		States with 0	6
2060	NCAH	FL	103	Boca Ciega	10.5		average per state	16.2727
2060	NCAH	FL	103	St. Pete Beach	50.5		median per state	3
2060	NCAH	FL	111	Hutchinson Island	35.2
2060	NCAH	FL	87	Middle Keys	67.8
2060	NCAH	FL	9	Cocoa Beach-Cape Canaveral	14.8
2060	NCAH	FL	9	Melbourne Shores-Floridana Beach	30.9
2060	NCAH	FL	9	Merritt Island	30.1
2060	NCAH	FL	9	Space Center	29
2060	NCAH	FL	89	Fernandina Beach	11.1
2060	NCAH	GA	127	Jekyll Island	30.7
2060	NCAH	GA	51	Tybee Island-Wilmington Island	32.9
2060	NCAH	GA	51	Montgomery	28.4
2060	NCAH	GA	51	Savannah	16.8
2060	NCAH	GA	191	Darien	12.2
2060	NCAH	GA	127	Brunswick	24.1
2060	NCAH	GA	127	St. Simons	26.4
2060	NCAH	LA	45	10	43.1
2060	NCAH	LA	45	12	29.8
2060	NCAH	LA	87	B	78.3
2060	NCAH	LA	87	D	12.6
2060	NCAH	LA	87	A	76.7
2060	NCAH	LA	87	E	15.9
2060	NCAH	LA	53	1	25.2
2060	NCAH	LA	113	4	10.7
2060	NCAH	LA	19	8	18.9
2060	NCAH	LA	113	13	79.5
2060	NCAH	LA	101	5	32.5
2060	NCAH	LA	101	6	51.9
2060	NCAH	LA	101	7	70.1
2060	NCAH	LA	7	2	73
2060	NCAH	LA	7	3	86.1
2060	NCAH	LA	7	7	73.3
2060	NCAH	LA	7	9	96.6
2060	NCAH	LA	47	11	36.5
2060	NCAH	LA	51	1	93.5
2060	NCAH	LA	51	4	53.5
2060	NCAH	LA	51	5	41.4
2060	NCAH	LA	23	6	89.2
2060	NCAH	LA	101	2	33.3
2060	NCAH	LA	101	3	94
2060	NCAH	LA	101	8	77.5
2060	NCAH	LA	103	4	34.3
2060	NCAH	LA	103	13	58.6
2060	NCAH	LA	113	10	25.2
2060	NCAH	LA	113	9	77
2060	NCAH	LA	5	10	36.1
2060	NCAH	LA	5	2	57.6
2060	NCAH	LA	95	5	30.3
2060	NCAH	LA	57	1	52.5
2060	NCAH	LA	57	4	72.6
2060	NCAH	LA	57	6	88.5
2060	NCAH	LA	57	9	150.4
2060	NCAH	LA	57	2	98
2060	NCAH	LA	57	3	99
2060	NCAH	LA	19	12	16.7
2060	NCAH	LA	113	6	12.4
2060	NCAH	LA	113	8	53.8
2060	NCAH	LA	113	14	66.6
2060	NCAH	LA	95	2	64.8
2060	NCAH	LA	95	3	59.1
2060	NCAH	LA	95	4	40.3
2060	NCAH	LA	95	7	44
2060	NCAH	LA	95	6	21.2
2060	NCAH	LA	109	6	78.5
2060	NCAH	LA	109	9	81.4
2060	NCAH	LA	109	7	92.7
2060	NCAH	LA	109	1	49.7
2060	NCAH	LA	109	3	66.6
2060	NCAH	LA	109	5	44.3
2060	NCAH	LA	47	10	47.7
2060	NCAH	LA	101	1	52.3
2060	NCAH	LA	101	4	74.5
2060	NCAH	LA	23	4	93.3
2060	NCAH	LA	23	7	67.1
2060	NCAH	LA	23	1	86.4
2060	NCAH	LA	23	5	95.9
2060	NCAH	LA	23	2	76
2060	NCAH	LA	23	3	76.8
2060	NCAH	LA	89	1	83.3
2060	NCAH	LA	89	3	70.1
2060	NCAH	LA	89	6	14.9
2060	NCAH	LA	75	3	99.3
2060	NCAH	LA	75	4	46.5
2060	NCAH	LA	75	8	64.7
2060	NCAH	LA	75	7	67.7
2060	NCAH	LA	75	6	96.7
2060	NCAH	LA	89	7	88.6
2060	NCAH	LA	89	5	53.6
2060	NCAH	LA	103	11	11.5
2060	NCAH	LA	103	12	41.7
2060	NCAH	LA	109	2	87.9
2060	NCAH	LA	109	4	66.1
2060	NCAH	LA	109	8	71.4
2060	NCAH	LA	51	3	42.7
2060	NCAH	LA	63	8	15.8
2060	NCAH	LA	93	1	49.5
2060	NCAH	LA	93	3	76
2060	NCAH	LA	93	6	81.1
2060	NCAH	LA	93	7	86.6
2060	NCAH	LA	95	1	69.5
2060	NCAH	LA	99	1	21
2060	NCAH	LA	89	2	72.2
2060	NCAH	LA	89	4	99.5
2060	NCAH	LA	53	13	33.1
2060	NCAH	LA	45	13	60.3
2060	NCAH	LA	7	1	64.4
2060	NCAH	LA	7	4	83.4
2060	NCAH	LA	7	6	78.8
2060	NCAH	LA	93	5	66.4
2060	NCAH	LA	57	5	94.6
2060	NCAH	LA	57	7	93.5
2060	NCAH	LA	57	8	95.4
2060	NCAH	LA	103	14	20.5
2060	NCAH	LA	103	10	10.8
2060	NCAH	LA	75	1	45.4
2060	NCAH	LA	75	5	82.6
2060	NCAH	LA	75	9	82
2060	NCAH	LA	93	2	45.3
2060	NCAH	LA	93	4	57.1
2060	NCAH	LA	5	5	15
2060	NCAH	LA	5	6	80.1
2060	NCAH	LA	5	9	38.5
2060	NCAH	LA	47	2	44.6
2060	NCAH	LA	71	New Orleans	53.1
2060	NCAH	LA	7	5	62.4
2060	NCAH	LA	7	8	86.9
2060	NCAH	ME	13	Muscle Ridge Islands	11.1
2060	NCAH	MD	35	4, Kent Island	10.2
2060	NCAH	MD	47	6, Northern	10.9
2060	NCAH	MD	47	7, Ocean City	36.7
2060	NCAH	MD	19	3, Vienna	14.6
2060	NCAH	MD	19	6, Hoopers Island	94.7
2060	NCAH	MD	19	5, Lakes	99.4
2060	NCAH	MD	19	8, Neck	96.5
2060	NCAH	MD	19	17, Salem	27.1
2060	NCAH	MD	19	18, Elliott	41.1
2060	NCAH	MD	19	9, Church Creek	70.7
2060	NCAH	MD	19	13, Bucktown	27.3
2060	NCAH	MD	41	5, Bay Hundred	17.9
2060	NCAH	MD	29	5, Edesville	12
2060	NCAH	MD	19	4, Taylors Island	96.9
2060	NCAH	MD	19	7, Cambridge	19.8
2060	NCAH	MD	19	10, Straits	98.8
2060	NCAH	MD	19	11, Drawbridge	85.2
2060	NCAH	MD	19	16, Madison	99.4
2060	NCAH	MD	39	3, Brinkleys	41
2060	NCAH	MD	39	8, Lawsons	62
2060	NCAH	MD	39	13, Westover	19.3
2060	NCAH	MD	41	2, St. Michaels	15.2
2060	NCAH	MD	45	17, Westside	31.5
2060	NCAH	MD	47	3, Sinepuxent	26
2060	NCAH	MD	47	5, Ocean Pines	10.7
2060	NCAH	MD	37	9, St. George Island	74.9
2060	NCAH	MD	39	2, St. Peters	61.2
2060	NCAH	MD	39	5, Mount Vernon	13.8
2060	NCAH	MD	39	12, Asbury	98.6
2060	NCAH	MD	39	6, Fairmount	67.1
2060	NCAH	MD	39	7, Crisfield	95.6
2060	NCAH	MD	39	9, Tangier	40.1
2060	NCAH	MD	39	10, Smith Island	51.4
2060	NCAH	MD	39	11, Dames Quarter	61
2060	NCAH	MD	39	14, Deal Island	67
2060	NCAH	MA	25	Revere	18.9
2060	NCAH	MA	9	Nahant	18.4
2060	NCAH	MA	17	Cambridge	10.1
2060	NCAH	MA	17	Everett	15.3
2060	NCAH	MA	23	Hull	21.8
2060	NCAH	MA	25	Winthrop Town	23
2060	NCAH	MA	25	Chelsea	30
2060	NCAH	MA	9	Salisbury	10.9
2060	NCAH	MA	1	Chatham	12.7
2060	NCAH	MS	59	3	15.9
2060	NCAH	NJ	17	North Bergen	19.1
2060	NCAH	NJ	33	Lower Alloways Creek	24.8
2060	NCAH	NJ	5	Burlington	31
2060	NCAH	NJ	33	Carneys Point	15
2060	NCAH	NJ	3	Leonia	14.4
2060	NCAH	NJ	3	Little Ferry	75.4
2060	NCAH	NJ	3	Moonachie	93.8
2060	NCAH	NJ	3	Ridgefield	21.4
2060	NCAH	NJ	3	Ridgefield Park	11.2
2060	NCAH	NJ	3	South Hackensack	38.4
2060	NCAH	NJ	3	Teterboro	85.9
2060	NCAH	NJ	29	Seaside Park	50.6
2060	NCAH	NJ	17	Secaucus	25.7
2060	NCAH	NJ	9	Avalon	35.7
2060	NCAH	NJ	3	Carlstadt	49.8
2060	NCAH	NJ	3	East Rutherford	32.3
2060	NCAH	NJ	17	Hoboken	49.8
2060	NCAH	NJ	17	Kearny	29.3
2060	NCAH	NJ	7	Brooklawn	14.9
2060	NCAH	NJ	7	Gloucester City	16.7
2060	NCAH	NJ	11	Greenwich	10.4
2060	NCAH	NJ	7	Woodlynne	13.8
2060	NCAH	NJ	11	Downe	19
2060	NCAH	NJ	9	Sea Isle City	61.7
2060	NCAH	NJ	1	Atlantic City	50.2
2060	NCAH	NJ	15	Logan	14.2
2060	NCAH	NJ	29	Long Beach	57.6
2060	NCAH	NJ	29	Surf City	71.4
2060	NCAH	NJ	29	Tuckerton	22.8
2060	NCAH	NJ	7	Camden	12.2
2060	NCAH	NJ	9	Cape May	24
2060	NCAH	NJ	9	Cape May Point	42.4
2060	NCAH	NJ	9	North Wildwood	54.6
2060	NCAH	NJ	9	Ocean City	58.9
2060	NCAH	NJ	9	Stone Harbor	40.2
2060	NCAH	NJ	9	West Cape May	29.2
2060	NCAH	NJ	9	West Wildwood	95.4
2060	NCAH	NJ	9	Wildwood	58.3
2060	NCAH	NJ	9	Wildwood Crest	33.5
2060	NCAH	NJ	15	Greenwich	17.2
2060	NCAH	NJ	15	National Park	17.7
2060	NCAH	NJ	29	Barnegat Light	39.9
2060	NCAH	NJ	29	Bay Head	61.8
2060	NCAH	NJ	29	Beach Haven	66.3
2060	NCAH	NJ	29	Harvey Cedars	60.8
2060	NCAH	NJ	29	Island Heights	16
2060	NCAH	NJ	29	Lavallette	73.3
2060	NCAH	NJ	29	Mantoloking	57.2
2060	NCAH	NJ	29	Ocean Gate	44.2
2060	NCAH	NJ	29	Point Pleasant	10.4
2060	NCAH	NJ	29	Point Pleasant Beach	36.3
2060	NCAH	NJ	29	Seaside Heights	59.8
2060	NCAH	NJ	29	Ship Bottom	76.9
2060	NCAH	NJ	33	Penns Grove	22.1
2060	NCAH	NJ	33	Pennsville	35.4
2060	NCAH	NJ	33	Salem	58.3
2060	NCAH	NJ	33	Elsinboro	68.6
2060	NCAH	NJ	3	Lyndhurst	14.2
2060	NCAH	NJ	3	Hackensack	12.7
2060	NCAH	NJ	25	Avon-by-the-Sea	10.9
2060	NCAH	NJ	25	Highlands	26.1
2060	NCAH	NJ	25	Little Silver	12.6
2060	NCAH	NJ	25	Manasquan	29.1
2060	NCAH	NJ	25	Monmouth Beach	53.8
2060	NCAH	NJ	25	Rumson	13.6
2060	NCAH	NJ	25	Oceanport	17.2
2060	NCAH	NJ	25	Sea Bright	64.7
2060	NCAH	NJ	25	Union Beach	21.2
2060	NCAH	NJ	39	Linden	10.8
2060	NCAH	NJ	1	Brigantine	48
2060	NCAH	NJ	1	Longport	73.3
2060	NCAH	NJ	1	Margate City	55.7
2060	NCAH	NJ	1	Ventnor City	53.9
2060	NCAH	NY	103	Poospatuck	13.9
2060	NCAH	NY	103	Shinnecock	13.8
2060	NCAH	NY	59	Long Beach	26.4
2060	NCAH	NC	73	Hall	10.2
2060	NCAH	NC	55	Atlantic	14
2060	NCAH	NC	55	East Lake	97.7
2060	NCAH	NC	55	Hatteras	27.6
2060	NCAH	NC	55	Kinnakeet	52.2
2060	NCAH	NC	187	Scuppernong	12.8
2060	NCAH	NC	29	Shiloh	26.7
2060	NCAH	NC	95	Lake Mattamuskeet	92.5
2060	NCAH	NC	95	Ocracoke	68.2
2060	NCAH	NC	95	Swan Quarter	97.5
2060	NCAH	NC	177	Alligator	84.4
2060	NCAH	NC	177	Scuppernong	34.8
2060	NCAH	NC	177	South Fork	23.1
2060	NCAH	NC	95	Lake Landing	93.4
2060	NCAH	NC	31	Davis	11.7
2060	NCAH	NC	31	Smyrna	19.8
2060	NCAH	NC	31	Atlantic	13
2060	NCAH	NC	55	Nags Head	18.7
2060	NCAH	NC	177	Columbia	81.8
2060	NCAH	NC	177	Gum Neck	83.2
2060	NCAH	NC	31	Beaufort	16
2060	NCAH	NC	31	Sea Level	72.1
2060	NCAH	NC	31	Straits	15.7
2060	NCAH	NC	13	Pantego	11.7
2060	NCAH	NC	53	Fruitville	35
2060	NCAH	NC	95	Currituck	35.1
2060	NCAH	NC	95	Fairfield	78.4
2060	NCAH	NC	137	2	17.9
2060	NCAH	NC	137	4	36
2060	NCAH	NC	53	Crawford	20
2060	NCAH	NC	53	Poplar Branch	11.8
2060	NCAH	NC	139	Salem	42
2060	NCAH	NC	55	Croatan	85.8
2060	NCAH	NC	31	Cedar Island	33.7
2060	NCAH	NC	31	Harkers Island	40.6
2060	NCAH	NC	31	Marshallberg	78.9
2060	NCAH	NC	31	Portsmouth	75
2060	NCAH	NC	31	Harlowe	14
2060	NCAH	NC	31	Stacy	61.3
2060	NCAH	NC	13	Bath	14.1
2060	NCAH	NC	13	Richland	12.6
2060	NCAH	NC	139	Elizabeth City	13.9
2060	NCAH	NC	139	Nixonton	13.5
2060	NCAH	SC	19	McClellanville	13.5
2060	NCAH	SC	19	Edisto Island	41.3
2060	NCAH	SC	19	Charleston Central	25.5
2060	NCAH	SC	13	Bluffton	11.8
2060	NCAH	SC	13	Sheldon	23.9
2060	NCAH	SC	19	Kiawah Island-Seabrook Island	70.8
2060	NCAH	SC	19	West Ashley	13.7
2060	NCAH	SC	15	Wando	10.1
2060	NCAH	SC	13	Beaufort-Port Royal	14.3
2060	NCAH	SC	13	Hilton Head Island	25.6
2060	NCAH	SC	13	St. Helena Island	27.3
2060	NCAH	SC	43	Waccamaw Neck	15.7
2060	NCAH	SC	19	Mount Pleasant	21
2060	NCAH	SC	19	Ravenel-Hollywood	12.8
2060	NCAH	SC	19	James Island	27.4
2060	NCAH	SC	19	Johns Island	16.2
2060	NCAH	SC	19	Wadmalaw Island	11.7
2060	NCAH	SC	29	Green Pond	23.7
2060	NCAH	TX	39	Brazosport	32.3
2060	NCAH	TX	167	La Marque-Hitchcock	19.7
2060	NCAH	TX	245	Sabine Pass	38.5
2060	NCAH	TX	167	Galveston	45.1
2060	NCAH	TX	167	Bolivar Peninsula	62.6
2060	NCAH	TX	361	Bridge City-Orangefield	14.8
2060	NCAH	TX	245	LaBelle	13.3
2060	NCAH	TX	71	Winnie-Stowell	13
2060	NCAH	TX	355	Port Aransas	37.9
2060	NCAH	TX	71	Anahuac	20.9
2060	NCAH	VA	115	Westville	21.2
2060	NCAH	VA	115	Chesapeake	47.5
2060	NCAH	VA	1	1	83.7
2060	NCAH	VA	1	7	13.9
2060	NCAH	VA	735	Poquoson	49.8
2060	NCAH	VA	103	3	20
2060	NCAH	VA	73	York	33.3
2060	NCAH	VA	650	Hampton	10.4
2060	NCAH	VA	131	3	13.2
2060	NCAH	VA	1	4	19.2
2060	NCAH	VA	1	8	16.3
2060	NCAH	CA	1	Alameda	12.9
2060	NCAH	WA	49	Naselle	14.3
2060	NCAH	WA	69	Puget Island	18

## Sheet: 8. 2060 NCAI
Year	Projection	State	County Code	Name	Pct Inundated		State	Number
2060	NCAI	DE	5	Lewes	10.8		AL	0
2060	NCAI	FL	71	Pine Island	11.1		CT	0
2060	NCAI	FL	71	Sanibel Island	18.6		DE	1
2060	NCAI	FL	71	Boca Grande	10		DC	0
2060	NCAI	FL	71	Estero Island	17.4		FL	18
2060	NCAI	FL	113	Navarre Beach	12.8		GA	6
2060	NCAI	FL	87	Cape Sable	50.3		LA	105
2060	NCAI	FL	87	Key West	38		ME	0
2060	NCAI	FL	87	Lower Keys	60.2		MD	27
2060	NCAI	FL	87	Upper Keys	22.7		MA	5
2060	NCAI	FL	86	Key Biscayne	25.9		MS	0
2060	NCAI	FL	86	Miami Beach	29.4		NH	0
2060	NCAI	FL	109	Ponte Vedra	10.9		NJ	55
2060	NCAI	FL	103	St. Pete Beach	15		NY	0
2060	NCAI	FL	111	Hutchinson Island	16		NC	25
2060	NCAI	FL	87	Middle Keys	39.4		PA	0
2060	NCAI	FL	9	Melbourne Shores-Floridana Beach	20.2		RI	0
2060	NCAI	FL	9	Merritt Island	18.2		SC	12
2060	NCAI	FL	9	Space Center	15		TX	8
2060	NCAI	GA	127	Jekyll Island	24.7		VA	8
2060	NCAI	GA	51	Tybee Island-Wilmington Island	22.9		CA	0
2060	NCAI	GA	51	Montgomery	17.2		OR	0
2060	NCAI	GA	51	Savannah	12.7		WA	2
2060	NCAI	GA	127	Brunswick	21.7
2060	NCAI	GA	127	St. Simons	21		total	272
2060	NCAI	LA	45	10	38
2060	NCAI	LA	45	12	26.6		States with 0	11
2060	NCAI	LA	87	B	76		average per state	12.2727
2060	NCAI	LA	87	A	74.5		median per state	0.5
2060	NCAI	LA	87	E	14.3
2060	NCAI	LA	53	1	15.3
2060	NCAI	LA	19	8	13.7
2060	NCAI	LA	113	13	72.9
2060	NCAI	LA	101	5	26.7
2060	NCAI	LA	101	6	45.3
2060	NCAI	LA	101	7	65
2060	NCAI	LA	7	2	70.8
2060	NCAI	LA	7	3	84
2060	NCAI	LA	7	7	64.2
2060	NCAI	LA	7	9	93.3
2060	NCAI	LA	47	11	34.5
2060	NCAI	LA	51	1	92.4
2060	NCAI	LA	51	4	50.9
2060	NCAI	LA	51	5	39.3
2060	NCAI	LA	23	6	83.5
2060	NCAI	LA	101	2	24.7
2060	NCAI	LA	101	3	90.2
2060	NCAI	LA	101	8	75.2
2060	NCAI	LA	103	4	32.3
2060	NCAI	LA	103	13	52.2
2060	NCAI	LA	113	10	16.1
2060	NCAI	LA	113	9	67.9
2060	NCAI	LA	5	10	30.7
2060	NCAI	LA	5	2	56.4
2060	NCAI	LA	95	5	27.9
2060	NCAI	LA	57	1	50.7
2060	NCAI	LA	57	4	68.7
2060	NCAI	LA	57	6	86.4
2060	NCAI	LA	57	9	149
2060	NCAI	LA	57	2	97.4
2060	NCAI	LA	57	3	98.6
2060	NCAI	LA	19	12	11.9
2060	NCAI	LA	113	8	37.6
2060	NCAI	LA	113	14	58.1
2060	NCAI	LA	95	2	62.7
2060	NCAI	LA	95	3	55
2060	NCAI	LA	95	4	38.1
2060	NCAI	LA	95	7	41.1
2060	NCAI	LA	95	6	15.9
2060	NCAI	LA	109	6	74.5
2060	NCAI	LA	109	9	76.3
2060	NCAI	LA	109	7	89.1
2060	NCAI	LA	109	1	42.8
2060	NCAI	LA	109	3	59.8
2060	NCAI	LA	109	5	39.8
2060	NCAI	LA	47	10	26.6
2060	NCAI	LA	101	1	47.5
2060	NCAI	LA	101	4	73.6
2060	NCAI	LA	23	4	87.2
2060	NCAI	LA	23	7	53.3
2060	NCAI	LA	23	1	76.3
2060	NCAI	LA	23	5	90.8
2060	NCAI	LA	23	2	69.1
2060	NCAI	LA	23	3	66.3
2060	NCAI	LA	89	1	81.3
2060	NCAI	LA	89	3	70.1
2060	NCAI	LA	89	6	14.3
2060	NCAI	LA	75	3	98.3
2060	NCAI	LA	75	4	45.8
2060	NCAI	LA	75	8	62.4
2060	NCAI	LA	75	7	65.8
2060	NCAI	LA	75	6	95.9
2060	NCAI	LA	89	7	85.1
2060	NCAI	LA	89	5	53
2060	NCAI	LA	103	12	18
2060	NCAI	LA	109	2	86.1
2060	NCAI	LA	109	4	60
2060	NCAI	LA	109	8	65.9
2060	NCAI	LA	51	3	41.5
2060	NCAI	LA	63	8	14.7
2060	NCAI	LA	93	1	47.3
2060	NCAI	LA	93	3	71.8
2060	NCAI	LA	93	6	78.3
2060	NCAI	LA	93	7	84.6
2060	NCAI	LA	95	1	69.2
2060	NCAI	LA	99	1	20.5
2060	NCAI	LA	89	2	68.1
2060	NCAI	LA	89	4	99.5
2060	NCAI	LA	53	13	26.7
2060	NCAI	LA	45	13	48.8
2060	NCAI	LA	7	1	62.6
2060	NCAI	LA	7	4	80.7
2060	NCAI	LA	7	6	76
2060	NCAI	LA	93	5	64.4
2060	NCAI	LA	57	5	92.6
2060	NCAI	LA	57	7	91
2060	NCAI	LA	57	8	94.2
2060	NCAI	LA	103	14	16.5
2060	NCAI	LA	75	1	43.3
2060	NCAI	LA	75	5	77.9
2060	NCAI	LA	75	9	78.7
2060	NCAI	LA	93	2	39.8
2060	NCAI	LA	93	4	56.1
2060	NCAI	LA	5	5	13.6
2060	NCAI	LA	5	6	76.3
2060	NCAI	LA	5	9	35.7
2060	NCAI	LA	47	2	38.9
2060	NCAI	LA	71	New Orleans	50.2
2060	NCAI	LA	7	5	58.1
2060	NCAI	LA	7	8	78.8
2060	NCAI	MD	47	7, Ocean City	14.8
2060	NCAI	MD	19	6, Hoopers Island	80.8
2060	NCAI	MD	19	5, Lakes	98.4
2060	NCAI	MD	19	8, Neck	79.9
2060	NCAI	MD	19	17, Salem	18.9
2060	NCAI	MD	19	18, Elliott	34.2
2060	NCAI	MD	19	9, Church Creek	49.4
2060	NCAI	MD	19	13, Bucktown	18.1
2060	NCAI	MD	19	4, Taylors Island	85.8
2060	NCAI	MD	19	7, Cambridge	15.5
2060	NCAI	MD	19	10, Straits	97.2
2060	NCAI	MD	19	11, Drawbridge	75.7
2060	NCAI	MD	19	16, Madison	98
2060	NCAI	MD	39	3, Brinkleys	27.7
2060	NCAI	MD	39	8, Lawsons	50.9
2060	NCAI	MD	39	13, Westover	11.2
2060	NCAI	MD	45	17, Westside	21.6
2060	NCAI	MD	47	3, Sinepuxent	16.8
2060	NCAI	MD	37	9, St. George Island	57.8
2060	NCAI	MD	39	2, St. Peters	50.6
2060	NCAI	MD	39	12, Asbury	95.8
2060	NCAI	MD	39	6, Fairmount	51.1
2060	NCAI	MD	39	7, Crisfield	89.2
2060	NCAI	MD	39	9, Tangier	24.5
2060	NCAI	MD	39	10, Smith Island	49.1
2060	NCAI	MD	39	11, Dames Quarter	48.9
2060	NCAI	MD	39	14, Deal Island	45.5
2060	NCAI	MA	25	Revere	14
2060	NCAI	MA	9	Nahant	12.6
2060	NCAI	MA	23	Hull	12.4
2060	NCAI	MA	25	Winthrop Town	14.9
2060	NCAI	MA	25	Chelsea	11.1
2060	NCAI	NJ	33	Lower Alloways Creek	17.6
2060	NCAI	NJ	5	Burlington	20.2
2060	NCAI	NJ	33	Carneys Point	11.4
2060	NCAI	NJ	3	Little Ferry	56.7
2060	NCAI	NJ	3	Moonachie	78.5
2060	NCAI	NJ	3	Ridgefield	10.6
2060	NCAI	NJ	3	South Hackensack	17.4
2060	NCAI	NJ	3	Teterboro	72.5
2060	NCAI	NJ	29	Seaside Park	33.7
2060	NCAI	NJ	17	Secaucus	10.8
2060	NCAI	NJ	9	Avalon	18.5
2060	NCAI	NJ	3	Carlstadt	38.7
2060	NCAI	NJ	3	East Rutherford	15.3
2060	NCAI	NJ	17	Kearny	16
2060	NCAI	NJ	7	Brooklawn	11.3
2060	NCAI	NJ	7	Gloucester City	10.4
2060	NCAI	NJ	11	Downe	13.7
2060	NCAI	NJ	9	Sea Isle City	33.6
2060	NCAI	NJ	1	Atlantic City	28.6
2060	NCAI	NJ	29	Long Beach	33.8
2060	NCAI	NJ	29	Surf City	40.6
2060	NCAI	NJ	29	Tuckerton	20
2060	NCAI	NJ	9	Cape May Point	23.6
2060	NCAI	NJ	9	North Wildwood	38.8
2060	NCAI	NJ	9	Ocean City	40.7
2060	NCAI	NJ	9	Stone Harbor	24.1
2060	NCAI	NJ	9	West Cape May	16.7
2060	NCAI	NJ	9	West Wildwood	88.1
2060	NCAI	NJ	9	Wildwood	41.5
2060	NCAI	NJ	9	Wildwood Crest	14.5
2060	NCAI	NJ	15	National Park	11.7
2060	NCAI	NJ	29	Barnegat Light	17.4
2060	NCAI	NJ	29	Bay Head	48.3
2060	NCAI	NJ	29	Beach Haven	49.2
2060	NCAI	NJ	29	Harvey Cedars	34.2
2060	NCAI	NJ	29	Lavallette	34.6
2060	NCAI	NJ	29	Mantoloking	38.7
2060	NCAI	NJ	29	Ocean Gate	22.7
2060	NCAI	NJ	29	Point Pleasant Beach	22.1
2060	NCAI	NJ	29	Seaside Heights	32.3
2060	NCAI	NJ	29	Ship Bottom	51.2
2060	NCAI	NJ	33	Penns Grove	15.5
2060	NCAI	NJ	33	Pennsville	25.2
2060	NCAI	NJ	33	Salem	45.8
2060	NCAI	NJ	33	Elsinboro	56.5
2060	NCAI	NJ	25	Highlands	21.4
2060	NCAI	NJ	25	Manasquan	21.3
2060	NCAI	NJ	25	Monmouth Beach	35.1
2060	NCAI	NJ	25	Oceanport	10.7
2060	NCAI	NJ	25	Sea Bright	43.2
2060	NCAI	NJ	25	Union Beach	11
2060	NCAI	NJ	1	Brigantine	26.1
2060	NCAI	NJ	1	Longport	45.9
2060	NCAI	NJ	1	Margate City	25.5
2060	NCAI	NJ	1	Ventnor City	32.3
2060	NCAI	NC	55	East Lake	91.3
2060	NCAI	NC	55	Hatteras	12.6
2060	NCAI	NC	55	Kinnakeet	25.6
2060	NCAI	NC	29	Shiloh	16.5
2060	NCAI	NC	95	Lake Mattamuskeet	81.9
2060	NCAI	NC	95	Ocracoke	51.2
2060	NCAI	NC	95	Swan Quarter	77
2060	NCAI	NC	177	Alligator	52.7
2060	NCAI	NC	177	Scuppernong	20.3
2060	NCAI	NC	95	Lake Landing	89.1
2060	NCAI	NC	177	Columbia	41.8
2060	NCAI	NC	177	Gum Neck	46.3
2060	NCAI	NC	31	Sea Level	44.2
2060	NCAI	NC	53	Fruitville	21.7
2060	NCAI	NC	95	Currituck	22.7
2060	NCAI	NC	95	Fairfield	69.9
2060	NCAI	NC	137	4	27.2
2060	NCAI	NC	53	Crawford	10.2
2060	NCAI	NC	139	Salem	22.4
2060	NCAI	NC	55	Croatan	72.5
2060	NCAI	NC	31	Cedar Island	18.6
2060	NCAI	NC	31	Harkers Island	24.4
2060	NCAI	NC	31	Marshallberg	43.1
2060	NCAI	NC	31	Portsmouth	60
2060	NCAI	NC	31	Stacy	10.8
2060	NCAI	SC	19	McClellanville	10.3
2060	NCAI	SC	19	Edisto Island	27
2060	NCAI	SC	19	Charleston Central	15.8
2060	NCAI	SC	13	Sheldon	16.9
2060	NCAI	SC	19	Kiawah Island-Seabrook Island	41.1
2060	NCAI	SC	13	Hilton Head Island	12.4
2060	NCAI	SC	13	St. Helena Island	16.3
2060	NCAI	SC	43	Waccamaw Neck	10.3
2060	NCAI	SC	19	Mount Pleasant	11
2060	NCAI	SC	19	James Island	16.9
2060	NCAI	SC	19	Johns Island	10.4
2060	NCAI	SC	29	Green Pond	16.6
2060	NCAI	TX	39	Brazosport	21.7
2060	NCAI	TX	167	La Marque-Hitchcock	12.7
2060	NCAI	TX	245	Sabine Pass	27
2060	NCAI	TX	167	Galveston	28.9
2060	NCAI	TX	167	Bolivar Peninsula	43.9
2060	NCAI	TX	71	Winnie-Stowell	10.1
2060	NCAI	TX	355	Port Aransas	15.9
2060	NCAI	TX	71	Anahuac	15.7
2060	NCAI	VA	115	Westville	14.5
2060	NCAI	VA	115	Chesapeake	28.6
2060	NCAI	VA	1	1	69.1
2060	NCAI	VA	735	Poquoson	30.2
2060	NCAI	VA	103	3	13.2
2060	NCAI	VA	73	York	21.9
2060	NCAI	VA	1	4	15.1
2060	NCAI	VA	1	8	10.1
2060	NCAI	WA	49	Naselle	10.8
2060	NCAI	WA	69	Puget Island	12.2

## Sheet: 9. 2060 NCAL
2060	NCAL	FL	87	Cape Sable	22		State	Number
2060	NCAL	FL	87	Key West	11		AL	0
2060	NCAL	FL	87	Lower Keys	29.2		CT	0
2060	NCAL	FL	86	Key Biscayne	11.5		DE	0
2060	NCAL	FL	87	Middle Keys	19.9		DC	0
2060	NCAL	GA	127	Jekyll Island	18.8		FL	5
2060	NCAL	GA	51	Tybee Island-Wilmington Island	14.1		GA	4
2060	NCAL	GA	127	Brunswick	19.1		LA	97
2060	NCAL	GA	127	St. Simons	16.2		ME	0
2060	NCAL	LA	45	10	28.8		MD	23
2060	NCAL	LA	45	12	20.4		MA	0
2060	NCAL	LA	87	B	70.9		MS	0
2060	NCAL	LA	87	A	70.3		NH	0
2060	NCAL	LA	87	E	12		NJ	27
2060	NCAL	LA	113	13	60.4		NY	0
2060	NCAL	LA	101	5	20.1		NC	15
2060	NCAL	LA	101	6	30.8		PA	0
2060	NCAL	LA	101	7	54.6		RI	0
2060	NCAL	LA	7	2	52.1		SC	3
2060	NCAL	LA	7	3	75.7		TX	5
2060	NCAL	LA	7	7	35.1		VA	4
2060	NCAL	LA	7	9	78.6		CA	0
2060	NCAL	LA	47	11	33		OR	0
2060	NCAL	LA	51	1	89.6		WA	0
2060	NCAL	LA	51	4	47.6
2060	NCAL	LA	51	5	39.1		total	183
2060	NCAL	LA	23	6	72
2060	NCAL	LA	101	2	19		States with 0	13
2060	NCAL	LA	101	3	84.5		average per state	8.31818
2060	NCAL	LA	101	8	59.5		median per state	0
2060	NCAL	LA	103	4	23.9
2060	NCAL	LA	103	13	41.9
2060	NCAL	LA	113	9	55.7
2060	NCAL	LA	5	10	16.6
2060	NCAL	LA	5	2	47.8
2060	NCAL	LA	95	5	18.1
2060	NCAL	LA	57	1	42.2
2060	NCAL	LA	57	4	55.8
2060	NCAL	LA	57	6	79.4
2060	NCAL	LA	57	9	143
2060	NCAL	LA	57	2	91.6
2060	NCAL	LA	57	3	95.6
2060	NCAL	LA	113	8	22.9
2060	NCAL	LA	113	14	46
2060	NCAL	LA	95	2	43.5
2060	NCAL	LA	95	3	33.4
2060	NCAL	LA	95	4	28.7
2060	NCAL	LA	95	7	23.5
2060	NCAL	LA	109	6	64.1
2060	NCAL	LA	109	9	66.4
2060	NCAL	LA	109	7	79.4
2060	NCAL	LA	109	1	30.4
2060	NCAL	LA	109	3	39.5
2060	NCAL	LA	109	5	30.1
2060	NCAL	LA	101	1	39.4
2060	NCAL	LA	101	4	69.5
2060	NCAL	LA	23	4	79.3
2060	NCAL	LA	23	7	41.8
2060	NCAL	LA	23	1	62.6
2060	NCAL	LA	23	5	81.4
2060	NCAL	LA	23	2	57.4
2060	NCAL	LA	23	3	56
2060	NCAL	LA	89	1	69.9
2060	NCAL	LA	89	3	69.7
2060	NCAL	LA	89	6	11.6
2060	NCAL	LA	75	3	95.9
2060	NCAL	LA	75	4	43.1
2060	NCAL	LA	75	8	59.1
2060	NCAL	LA	75	7	61
2060	NCAL	LA	75	6	94.3
2060	NCAL	LA	89	7	60
2060	NCAL	LA	89	5	50
2060	NCAL	LA	103	12	10.6
2060	NCAL	LA	109	2	78.9
2060	NCAL	LA	109	4	48.8
2060	NCAL	LA	109	8	57
2060	NCAL	LA	51	3	33.7
2060	NCAL	LA	63	8	11
2060	NCAL	LA	93	1	37.1
2060	NCAL	LA	93	3	51
2060	NCAL	LA	93	6	65.3
2060	NCAL	LA	93	7	71.9
2060	NCAL	LA	95	1	67
2060	NCAL	LA	99	1	18.5
2060	NCAL	LA	89	2	55.1
2060	NCAL	LA	89	4	98.9
2060	NCAL	LA	53	13	19.8
2060	NCAL	LA	45	13	33.3
2060	NCAL	LA	7	1	46.3
2060	NCAL	LA	7	4	63.4
2060	NCAL	LA	7	6	62.5
2060	NCAL	LA	93	5	53.2
2060	NCAL	LA	57	5	86.5
2060	NCAL	LA	57	7	85.3
2060	NCAL	LA	57	8	92.4
2060	NCAL	LA	75	1	39.8
2060	NCAL	LA	75	5	69.6
2060	NCAL	LA	75	9	73
2060	NCAL	LA	93	2	20.5
2060	NCAL	LA	93	4	50.3
2060	NCAL	LA	5	6	59.4
2060	NCAL	LA	5	9	25.1
2060	NCAL	LA	47	2	22.7
2060	NCAL	LA	71	New Orleans	40.6
2060	NCAL	LA	7	5	40.5
2060	NCAL	LA	7	8	48
2060	NCAL	MD	19	6, Hoopers Island	55
2060	NCAL	MD	19	5, Lakes	94.4
2060	NCAL	MD	19	8, Neck	46.6
2060	NCAL	MD	19	17, Salem	14.6
2060	NCAL	MD	19	18, Elliott	29.2
2060	NCAL	MD	19	9, Church Creek	26.3
2060	NCAL	MD	19	13, Bucktown	13.6
2060	NCAL	MD	19	4, Taylors Island	61
2060	NCAL	MD	19	10, Straits	93.4
2060	NCAL	MD	19	11, Drawbridge	62.2
2060	NCAL	MD	19	16, Madison	82.6
2060	NCAL	MD	39	3, Brinkleys	19.4
2060	NCAL	MD	39	8, Lawsons	35.1
2060	NCAL	MD	45	17, Westside	13.4
2060	NCAL	MD	37	9, St. George Island	40.1
2060	NCAL	MD	39	2, St. Peters	37.5
2060	NCAL	MD	39	12, Asbury	81.8
2060	NCAL	MD	39	6, Fairmount	39.7
2060	NCAL	MD	39	7, Crisfield	64.3
2060	NCAL	MD	39	9, Tangier	11.4
2060	NCAL	MD	39	10, Smith Island	41.6
2060	NCAL	MD	39	11, Dames Quarter	35.4
2060	NCAL	MD	39	14, Deal Island	22.7
2060	NCAL	NJ	33	Lower Alloways Creek	11.8
2060	NCAL	NJ	3	Little Ferry	33.7
2060	NCAL	NJ	3	Moonachie	57.1
2060	NCAL	NJ	3	Teterboro	41.8
2060	NCAL	NJ	29	Seaside Park	15.1
2060	NCAL	NJ	3	Carlstadt	25.6
2060	NCAL	NJ	29	Long Beach	13.7
2060	NCAL	NJ	29	Surf City	10.3
2060	NCAL	NJ	29	Tuckerton	16.4
2060	NCAL	NJ	9	North Wildwood	18.5
2060	NCAL	NJ	9	Ocean City	20.4
2060	NCAL	NJ	9	West Wildwood	80.2
2060	NCAL	NJ	9	Wildwood	15.8
2060	NCAL	NJ	29	Bay Head	26
2060	NCAL	NJ	29	Beach Haven	19.5
2060	NCAL	NJ	29	Mantoloking	14.5
2060	NCAL	NJ	29	Ship Bottom	13.2
2060	NCAL	NJ	33	Pennsville	17.1
2060	NCAL	NJ	33	Salem	34.1
2060	NCAL	NJ	33	Elsinboro	43.4
2060	NCAL	NJ	25	Highlands	12.3
2060	NCAL	NJ	25	Manasquan	13
2060	NCAL	NJ	25	Monmouth Beach	19.3
2060	NCAL	NJ	25	Sea Bright	26.8
2060	NCAL	NJ	1	Brigantine	11
2060	NCAL	NJ	1	Longport	12.3
2060	NCAL	NJ	1	Ventnor City	12.1
2060	NCAL	NC	55	East Lake	81.2
2060	NCAL	NC	95	Lake Mattamuskeet	71
2060	NCAL	NC	95	Ocracoke	25.1
2060	NCAL	NC	95	Swan Quarter	40.7
2060	NCAL	NC	177	Alligator	25
2060	NCAL	NC	95	Lake Landing	77.6
2060	NCAL	NC	177	Columbia	12.2
2060	NCAL	NC	177	Gum Neck	25.4
2060	NCAL	NC	53	Fruitville	11.5
2060	NCAL	NC	95	Currituck	10.5
2060	NCAL	NC	95	Fairfield	60.2
2060	NCAL	NC	137	4	15.9
2060	NCAL	NC	55	Croatan	58.2
2060	NCAL	NC	31	Marshallberg	10.7
2060	NCAL	NC	31	Portsmouth	41.1
2060	NCAL	SC	19	Edisto Island	17.4
2060	NCAL	SC	19	Kiawah Island-Seabrook Island	13.1
2060	NCAL	SC	29	Green Pond	10.4
2060	NCAL	TX	39	Brazosport	11.6
2060	NCAL	TX	245	Sabine Pass	16.2
2060	NCAL	TX	167	Galveston	14.3
2060	NCAL	TX	167	Bolivar Peninsula	30.1
2060	NCAL	TX	71	Anahuac	11.2
2060	NCAL	VA	115	Chesapeake	13.2
2060	NCAL	VA	1	1	40.6
2060	NCAL	VA	735	Poquoson	13.8
2060	NCAL	VA	73	York	11

[truncated: 8 more sheets: 10. 2070 NCAH, 11. 2080 NCAH, 12. 2080 NCAI, 13. 2090 NCAH, 14. 2100 NCAH, 15. 2100 NCAI, 16. 2100 NCAL, 17. Tide gauge data]
